# Supplementary material for: Isolated molybdenum-based microporous POMs for selective adsorption of gases
Source: Royal Society of Chemistry journal article supplement (doi:10.1039/d2dt00134a), 2022-01-01
Supplement: d2dt00134a1.pdf [file d2dt00134a1.pdf]

## Supporting materials

### Isolated molybdenum-based microporous POMs for selective adsorption of gases

Lan Deng, Rong-Yan Lin, Zhao-Hui Zhou\*

*State Key Laboratory of Physical Chemistry of Solid Surfaces and Department of Chemistry, College of Chemistry and Chemical Engineering, Xiamen University, Xiamen, 361005, China, Tel: + 86-592-2184531; Fax: + 86-592-2183047  
zhzhou@xmu.edu.cn*

#### Figure and Table Options

- Figure S1.** Perspective view of  $[\text{Mo}_{12}\text{O}_{12}(\mu_2\text{-O})_4(\mu_3\text{-O})_{12}(\text{Htrz})_4(\text{trz})_4]\cdot 22\text{H}_2\text{O}$  (**1**, a), free and disordered water molecules are omitted for clarity. 2D packing diagrams of  $[\text{Mo}_{12}\text{O}_{12}(\mu_2\text{-O})_4(\mu_3\text{-O})_{12}(\text{Htrz})_4(\text{trz})_4]\cdot 22\text{H}_2\text{O}$  (**1**) in *a* (b), *b* (c) and *c* (d) axes.
- Figure S2.** Perspective view of  $[\text{Mo}_{12}\text{O}_{12}(\mu_2\text{-O})_4(\mu_3\text{-O})_{12}(\text{Htrz})_4(\text{trz})_4]\cdot 92\text{H}_2\text{O}$  (**2**, a), free and disordered water molecules are omitted for clarity. (b) A complete molecular of **2**. 2D packing diagrams of  $[\text{Mo}_{12}\text{O}_{12}(\mu_2\text{-O})_4(\mu_3\text{-O})_{12}(\text{Htrz})_4(\text{trz})_4]\cdot 92\text{H}_2\text{O}$  (**2**) in *a* (c) and *c* (d) axes.
- Figure S3.** Perspective view of  $[\text{Mo}_8\text{O}_8(\mu_2\text{-O})_{12}(\text{Htrz})_8]_{1/2}\cdot [\text{Mo}_{12}\text{O}_{12}(\mu_2\text{-O})_4(\mu_3\text{-O})_{12}(\text{Htrz})_4(\text{trz})_4]\cdot 44\text{H}_2\text{O}$  (**3**), free and disordered water molecules are omitted for clarity. (a) Main structure of  $[\text{Mo}_4\text{O}_4(\mu_2\text{-O})_6(\text{Htrz})_4]$  species. (b) Main structure of  $[\text{Mo}_{12}\text{O}_{12}(\mu_2\text{-O})_4(\mu_3\text{-O})_{12}(\text{Htrz})_4(\text{trz})_4]$  species. (c) Complete composite structure of  $[\text{Mo}_8\text{O}_8(\mu_2\text{-O})_{12}(\text{Htrz})_8]\cdot [\text{Mo}_{12}\text{O}_{12}(\mu_2\text{-O})_4(\mu_3\text{-O})_{12}(\text{Htrz})_4(\text{trz})_4]$  in **3**. Packing diagrams of  $[\text{Mo}_8\text{O}_8(\mu_2\text{-O})_{12}(\text{Htrz})_8]_{1/2}\cdot [\text{Mo}_{12}\text{O}_{12}(\mu_2\text{-O})_4(\mu_3\text{-O})_{12}(\text{Htrz})_4(\text{trz})_4]\cdot 44\text{H}_2\text{O}$  (**3**) in *a* (d) and *b* (e) axes.
- Figure S4.** Perspective view of  $[\text{Mo}_8\text{O}_8(\mu_2\text{-O})_{12}(\text{Htrz})_8] 62\text{H}_2\text{O}$  (**4**, a), free and disordered water molecules are omitted for clarity. (b) Holes with maximum diameter of 5.1 Å exist in each complete unit. (c) 2D layered diagram of  $[\text{Mo}_8\text{O}_8(\mu_2\text{-O})_{12}(\text{Htrz})_8] 62\text{H}_2\text{O}$  (**4**) in *b* axis.
- Figure S5.** (a) Perspective view of  $[\text{Mo}_{12}\text{O}_{12}(\mu_2\text{-O})_4(\mu_3\text{-O})_{12}(\text{Htrz})_4(\text{trz})_4]\cdot 22\text{H}_2\text{O}$  (**1**) before conducting mask command. (b) Highlighted hydrogen bonds between protonated N atoms and free water molecules. (c) Perspective view of **1** before solvent mask, thermal ellipsoids are drawn by ORTEP and represent 30% probability surfaces.

- Figure S6.** (a) Perspective view of  $[\text{Mo}_{12}\text{O}_{12}(\mu_2\text{-O})_4(\mu_3\text{-O})_{12}(\text{Htrz})_4(\text{trz})_4]\cdot 92\text{H}_2\text{O}$  (**2**) before conducting mask command. (b) Highlighted hydrogen bonds between C atoms, protonated N atoms and free water molecules. (c) Perspective view of **2** before solvent mask, thermal ellipsoids are drawn by ORTEP and represent 30% probability surfaces.
- Figure S7.** (a) Perspective view of  $[\text{Mo}_8\text{O}_8(\mu_2\text{-O})_{12}(\text{Htrz})_8]_{1/2}\cdot [\text{Mo}_{12}\text{O}_{12}(\mu_2\text{-O})_4(\mu_3\text{-O})_{12}(\text{Htrz})_4(\text{trz})_4]\cdot 44\text{H}_2\text{O}$  (**3**) before conducting mask command. (b) Highlighted hydrogen bonds between protonated N atoms and free water molecules. (c) Perspective view of **3** before solvent mask, thermal ellipsoids are drawn by ORTEP and represent 30% probability surfaces.
- Figure S8.** (a) Perspective view of  $[\text{Mo}_8\text{O}_8(\mu_2\text{-O})_{12}(\text{Htrz})_8] 62\text{H}_2\text{O}$  (**4**) before conducting mask command. (b) Highlighted hydrogen bonds between protonated N atoms and free water molecules. (c) Perspective view of **4** before solvent mask, thermal ellipsoids are drawn by ORTEP and represent 30% probability surfaces.
- Figure S9.** Gases adsorption isotherms of  $[\text{Mo}_{12}\text{O}_{12}(\mu_2\text{-O})_4(\mu_3\text{-O})_{12}(\text{Htrz})_4(\text{trz})_4]\cdot 22\text{H}_2\text{O}$  (**1**) at 298 K at different pressures for  $\text{O}_2$  (a),  $\text{CO}_2$  (b),  $\text{H}_2$  (c),  $\text{CH}_4$  (d),  $\text{N}_2$  (e) respectively.
- Figure S10.** Gases adsorption isotherms of  $[\text{Mo}_{12}\text{O}_{12}(\mu_2\text{-O})_4(\mu_3\text{-O})_{12}(\text{Htrz})_4(\text{trz})_4]\cdot 92\text{H}_2\text{O}$  (**2**) at 298 K at different pressures for  $\text{O}_2$  (a),  $\text{CO}_2$  (b),  $\text{H}_2$  (c),  $\text{CH}_4$  (d),  $\text{N}_2$  (e) respectively.
- Figure S11.** Gases adsorption isotherms of  $[\text{Mo}_8\text{O}_8(\mu_2\text{-O})_{12}(\text{Htrz})_8] 62\text{H}_2\text{O}$  (**4**) at 298 K at different pressures for  $\text{O}_2$  (a),  $\text{CO}_2$  (b),  $\text{H}_2$  (c),  $\text{CH}_4$  (d),  $\text{N}_2$  (e) respectively.
- Figure S12.**  $\text{O}_2$ ,  $\text{CO}_2$  and  $\text{CH}_4$  adsorption isotherms for **1**, **2** and **4** (a ~ c) respectively at 298 K and pressures of up to 1 bar.
- Figure S13.**  $\text{N}_2$  adsorption–desorption isotherms of **1**, **2** and **4** at 77 K respectively.
- Figure S14.** (a) TGA of  $[\text{Mo}_{12}\text{O}_{12}(\mu_2\text{-O})_4(\mu_3\text{-O})_{12}(\text{Htrz})_4(\text{trz})_4]\cdot 22\text{H}_2\text{O}$  (**1**); (b) TGA of  $[\text{Mo}_{12}\text{O}_{12}(\mu_2\text{-O})_4(\mu_3\text{-O})_{12}(\text{Htrz})_4(\text{trz})_4]\cdot 92\text{H}_2\text{O}$  (**2**); (c) TGA of  $[\text{Mo}_8\text{O}_8(\mu_2\text{-O})_{12}(\text{Htrz})_8] 62\text{H}_2\text{O}$  (**4**) respectively.
- Figure S15.** Powder XRD curves for  $[\text{Mo}_{12}\text{O}_{12}(\mu_2\text{-O})_4(\mu_3\text{-O})_{12}(\text{Htrz})_4(\text{trz})_4]\cdot n\text{H}_2\text{O}$  ( $n = 22$ , **1**;  $n = 92$ , **2**) and  $[\text{Mo}_8\text{O}_8(\mu_2\text{-O})_{12}(\text{Htrz})_8] 62\text{H}_2\text{O}$  (**4**) under different circumstances respectively.
- Figure S16.** IR spectra of  $[\text{Mo}_{12}\text{O}_{12}(\mu_2\text{-O})_4(\mu_3\text{-O})_{12}(\text{Htrz})_4(\text{trz})_4]\cdot n\text{H}_2\text{O}$  ( $n = 22$ , **1**;  $n = 92$ , **2**) and  $[\text{Mo}_8\text{O}_8(\mu_2\text{-O})_{12}(\text{Htrz})_8] 62\text{H}_2\text{O}$  (**4**) respectively.
- Figure S17.** FT-IR spectrum of 1H-1,2,3-triazole [ $\text{C}_2\text{H}_3\text{N}_3$ ] originated from Spectral Database for Organic Compounds SDBS. URL for this compound: <https://sdb.sdb.aist.go.jp/sdb/cgi-bin/landingpage?sdbno=41390>.
- Figure S18.** Diffused reflectance spectra of solid  $[\text{Mo}_{12}\text{O}_{12}(\mu_2\text{-O})_4(\mu_3\text{-O})_{12}(\text{Htrz})_4(\text{trz})_4]\cdot n\text{H}_2\text{O}$  ( $n = 22$ , **1**;  $n = 92$ , **2**) and  $[\text{Mo}_8\text{O}_8(\mu_2\text{-O})_{12}(\text{Htrz})_8] 62\text{H}_2\text{O}$  (**4**) respectively.
- Figure S19.** EPR spectra of solid **1**, **2** and **4** at 100 K respectively.
- Figure S20.** Solution  $^{13}\text{C}$  NMR spectrum of pure trz.

- Table S1.** Crystallographic data and structural refinements for complexes  $[\text{Mo}_{12}\text{O}_{12}(\mu_2\text{-O})_4(\mu_3\text{-O})_{12}(\text{Htrz})_4(\text{trz})_4] \cdot n\text{H}_2\text{O}$  ( $n = 22$ , **1**;  $n = 92$ , **2**),  $[\text{Mo}_4\text{O}_4(\mu_2\text{-O})_6(\text{Htrz})_4] \cdot [\text{Mo}_{12}\text{O}_{12}(\mu_2\text{-O})_4(\mu_3\text{-O})_{12}(\text{Htrz})_4(\text{trz})_4] \cdot 44\text{H}_2\text{O}$  (**3**) and  $[\text{Mo}_8\text{O}_8(\mu_2\text{-O})_{12}(\text{Htrz})_8] \cdot 62\text{H}_2\text{O}$  (**4**) respectively.
- Table S2.** Hydrogen bond distances (Å) and angles (°) in  $[\text{Mo}_{12}\text{O}_{12}(\mu_2\text{-O})_4(\mu_3\text{-O})_{12}(\text{Htrz})_4(\text{trz})_4] \cdot 22\text{H}_2\text{O}$  (**1**) before solvent mask.
- Table S3.** Hydrogen bond distances (Å) and angles (°) in  $[\text{Mo}_{12}\text{O}_{12}(\mu_2\text{-O})_4(\mu_3\text{-O})_{12}(\text{Htrz})_4(\text{trz})_4] \cdot 92\text{H}_2\text{O}$  (**2**) before solvent mask.
- Table S4.** Hydrogen bond distances (Å) and angles (°) in  $[\text{Mo}_8\text{O}_8(\mu_2\text{-O})_{12}(\text{Htrz})_8]_{1/2} \cdot [\text{Mo}_{12}\text{O}_{12}(\mu_2\text{-O})_4(\mu_3\text{-O})_{12}(\text{Htrz})_4(\text{trz})_4] \cdot 44\text{H}_2\text{O}$  (**3**) before solvent mask.
- Table S5.** Hydrogen bond distances (Å) and angles (°) in  $[\text{Mo}_8\text{O}_8(\mu_2\text{-O})_{12}(\text{Htrz})_8] \cdot 62\text{H}_2\text{O}$  (**4**) before solvent mask.
- Table S6.** Solvent mask values are calculated based on the unit cells for compounds **1** ~ **4** respectively.
- Table S7.** Selected bond distances (Å) and angles (°) in  $[\text{Mo}_{12}\text{O}_{12}(\mu_2\text{-O})_4(\mu_3\text{-O})_{12}(\text{Htrz})_4(\text{trz})_4] \cdot 22\text{H}_2\text{O}$  (**1**) after solvent mask and final refinements.
- Table S8.** Selected bond distances (Å) and angles (°) in  $[\text{Mo}_{12}\text{O}_{12}(\mu_2\text{-O})_4(\mu_3\text{-O})_{12}(\text{Htrz})_4(\text{trz})_4] \cdot 92\text{H}_2\text{O}$  (**2**) after solvent mask and final refinements.
- Table S9.** Selected bond distances (Å) and angles (°) in  $[\text{Mo}_8\text{O}_8(\mu_2\text{-O})_{12}(\text{Htrz})_8]_{1/2} \cdot [\text{Mo}_{12}\text{O}_{12}(\mu_2\text{-O})_4(\mu_3\text{-O})_{12}(\text{Htrz})_4(\text{trz})_4] \cdot 44\text{H}_2\text{O}$  (**3**) after solvent mask and final refinements.
- Table S10.** Selected bond distances (Å) and angles (°) in  $[\text{Mo}_8\text{O}_8(\mu_2\text{-O})_{12}(\text{Htrz})_8] \cdot 62\text{H}_2\text{O}$  (**4**) after solvent mask and final refinements.
- Table S11.** Detail calibrated adsorption data of  $\text{O}_2$ ,  $\text{N}_2$ ,  $\text{H}_2$ ,  $\text{CO}_2$  and  $\text{CH}_4$  for  $[\text{Mo}_{12}\text{O}_{12}(\mu_2\text{-O})_4(\mu_3\text{-O})_{12}(\text{Htrz})_4(\text{trz})_4] \cdot 22\text{H}_2\text{O}$  (**1**) at 298 K.
- Table S12.** Detail calibrated adsorption data of  $\text{O}_2$ ,  $\text{N}_2$ ,  $\text{H}_2$ ,  $\text{CO}_2$  and  $\text{CH}_4$  for  $[\text{Mo}_{12}\text{O}_{12}(\mu_2\text{-O})_4(\mu_3\text{-O})_{12}(\text{Htrz})_4(\text{trz})_4] \cdot 92\text{H}_2\text{O}$  (**2**) at 298 K.
- Table S13.** Detail calibrated adsorption data of  $\text{O}_2$ ,  $\text{N}_2$ ,  $\text{H}_2$ ,  $\text{CO}_2$  and  $\text{CH}_4$  for  $[\text{Mo}_8\text{O}_8(\mu_2\text{-O})_{12}(\text{Htrz})_8] \cdot 62\text{H}_2\text{O}$  (**4**) at 298 K.
- Table S14.** Bond valence calculations for complexes  $[\text{Mo}_{12}\text{O}_{12}(\mu_2\text{-O})_4(\mu_3\text{-O})_{12}(\text{Htrz})_4(\text{trz})_4] \cdot n\text{H}_2\text{O}$  ( $n = 22$ , **1**;  $n = 92$ , **2**),  $[\text{Mo}_8\text{O}_8(\mu_2\text{-O})_{12}(\text{Htrz})_8]_{1/2} \cdot [\text{Mo}_{12}\text{O}_{12}(\mu_2\text{-O})_4(\mu_3\text{-O})_{12}(\text{Htrz})_4(\text{trz})_4] \cdot 44\text{H}_2\text{O}$  (**3**) and  $[\text{Mo}_8\text{O}_8(\mu_2\text{-O})_{12}(\text{Htrz})_8] \cdot 62\text{H}_2\text{O}$  (**4**) respectively.

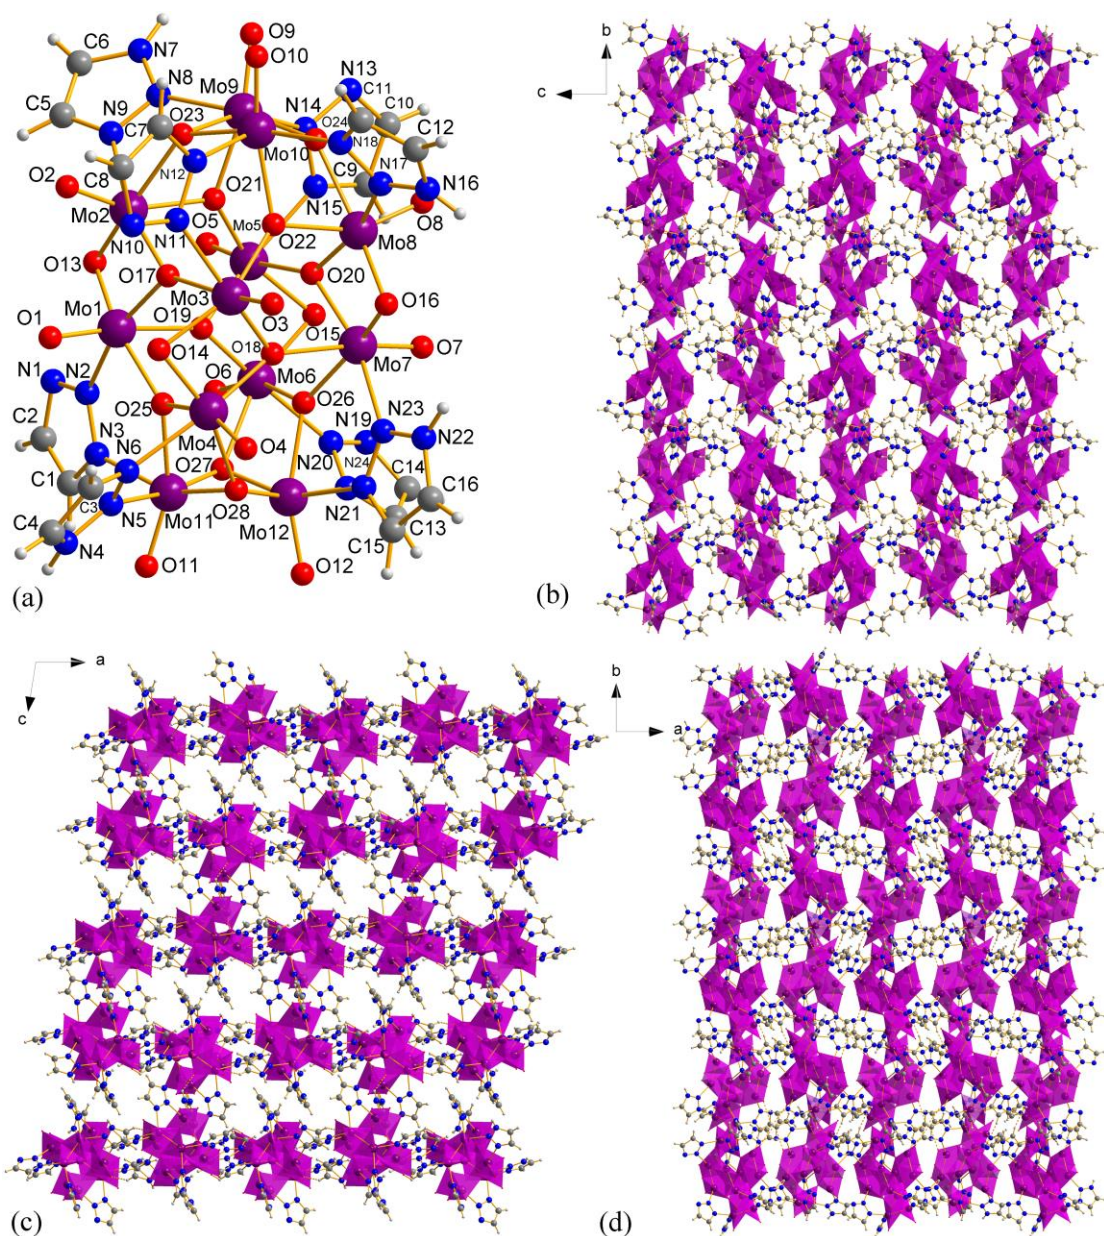

**Figure S1.** Perspective view of  $[\text{Mo}_{12}\text{O}_{12}(\mu_2\text{-O})_4(\mu_3\text{-O})_{12}(\text{Htrz})_4(\text{trz})_4]\cdot 22\text{H}_2\text{O}$  (**1**), free and disordered water molecules are omitted for clarity. 2D packing diagrams of  $[\text{Mo}_{12}\text{O}_{12}(\mu_2\text{-O})_4(\mu_3\text{-O})_{12}(\text{Htrz})_4(\text{trz})_4]\cdot 22\text{H}_2\text{O}$  (**1**) in *a* (b), *b* (c) and *c* (d) axes.

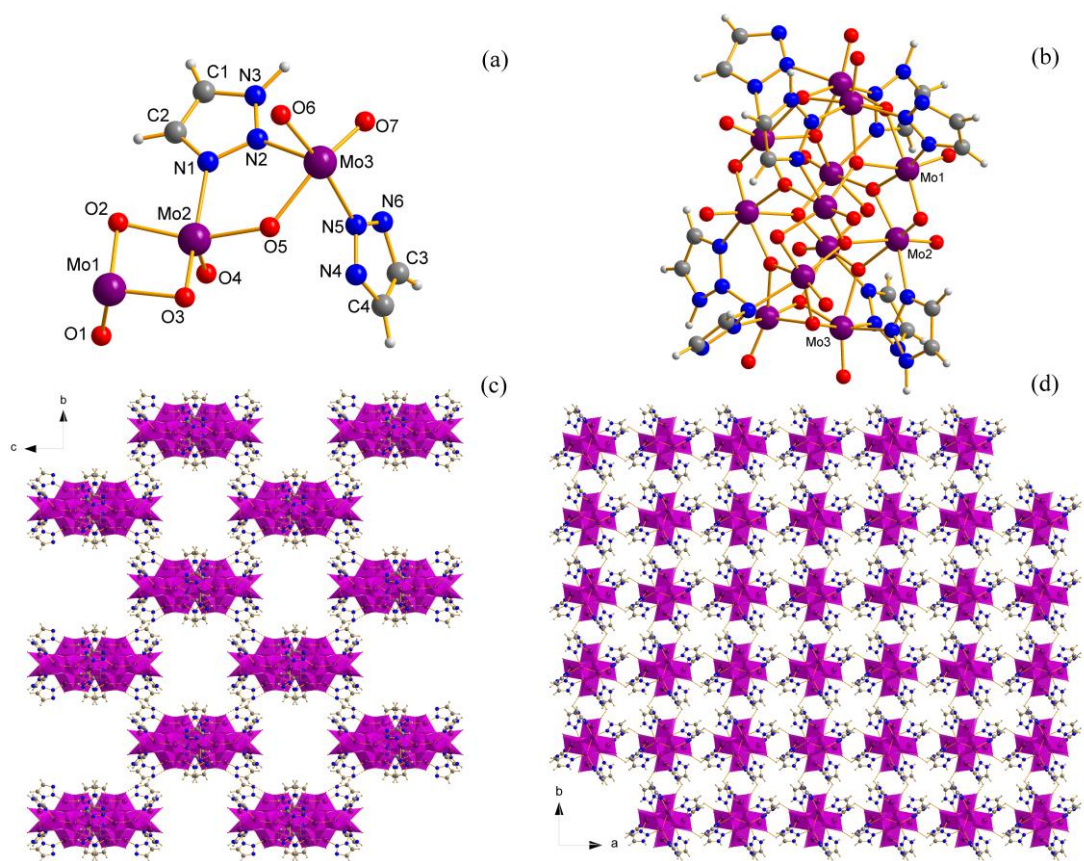

**Figure S2.** Perspective view of [Mo<sub>12</sub>O<sub>12</sub>(μ<sub>2</sub>-O)<sub>4</sub>(μ<sub>3</sub>-O)<sub>12</sub>(Htrz)<sub>4</sub>(trz)<sub>4</sub>]·92H<sub>2</sub>O (**2**, a), free and disordered water molecules are omitted for clarity. (b) A complete molecular of **2**. 2D packing diagrams of [Mo<sub>12</sub>O<sub>12</sub>(μ<sub>2</sub>-O)<sub>4</sub>(μ<sub>3</sub>-O)<sub>12</sub>(Htrz)<sub>4</sub>(trz)<sub>4</sub>]·92H<sub>2</sub>O (**2**) in *a* (c) and *c* (d) axes.

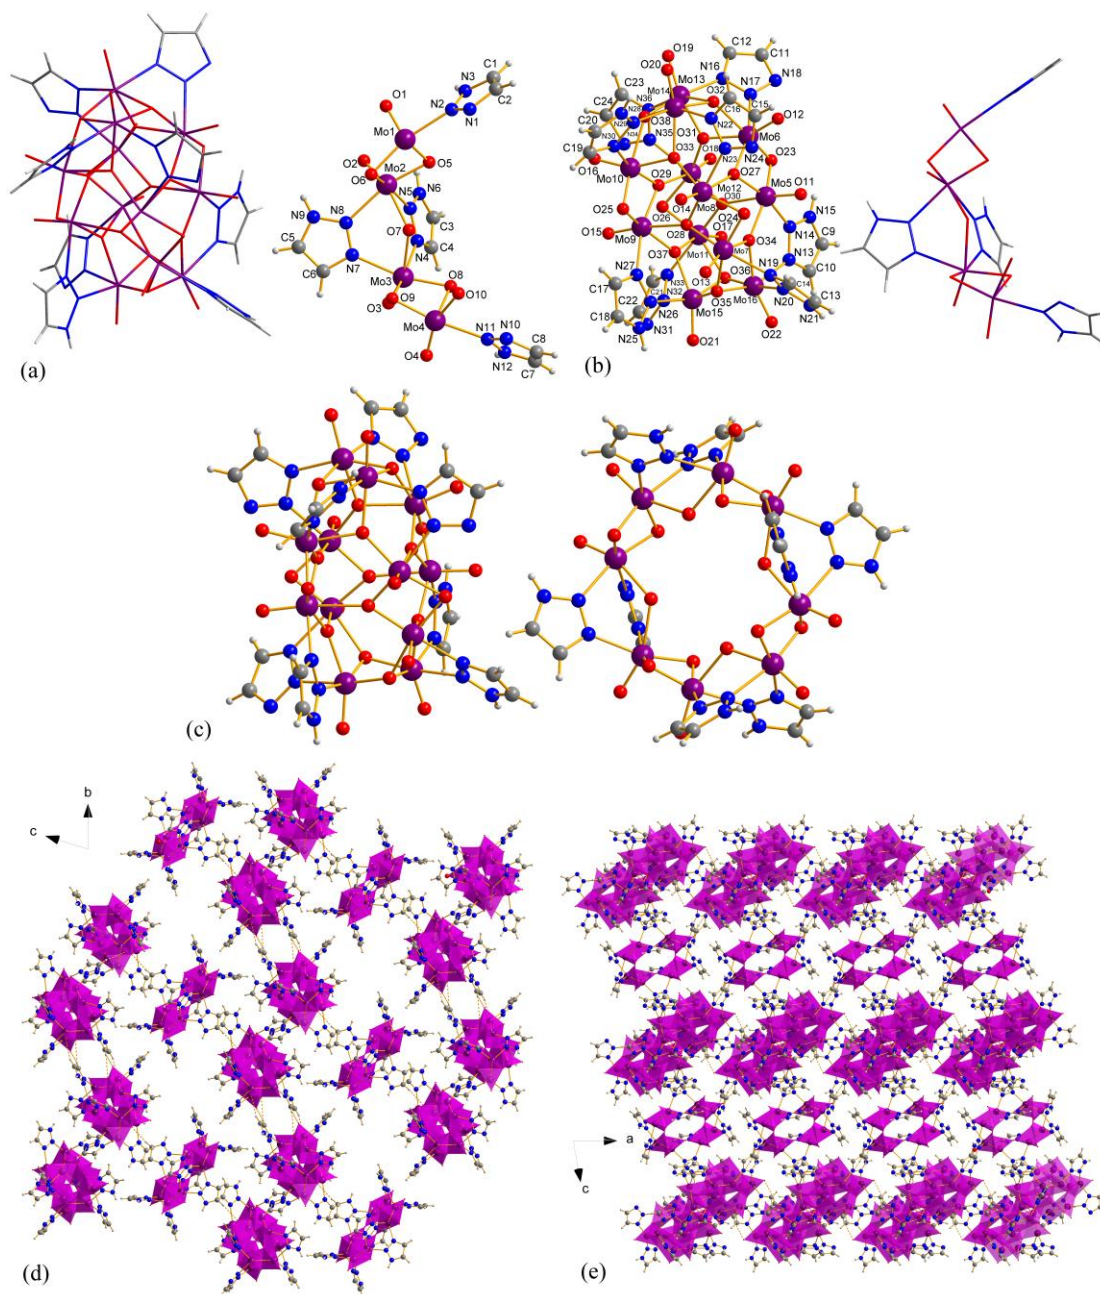

**Figure S3.** Perspective view of  $[\text{Mo}_8\text{O}_8(\mu_2\text{-O})_{12}(\text{Htrz})_8]_{1/2} \cdot [\text{Mo}_{12}\text{O}_{12}(\mu_2\text{-O})_4(\mu_3\text{-O})_{12}(\text{Htrz})_4(\text{trz})_4] \cdot 44\text{H}_2\text{O}$  (**3**), free and disordered water molecules are omitted for clarity. (a) Main structure of  $[\text{Mo}_4\text{O}_4(\mu_2\text{-O})_6(\text{Htrz})_4]$  species. (b) Main structure of  $[\text{Mo}_{12}\text{O}_{12}(\mu_2\text{-O})_4(\mu_3\text{-O})_{12}(\text{Htrz})_4(\text{trz})_4]$  species. (c) Complete composite structure of  $[\text{Mo}_8\text{O}_8(\mu_2\text{-O})_{12}(\text{Htrz})_8] \cdot [\text{Mo}_{12}\text{O}_{12}(\mu_2\text{-O})_4(\mu_3\text{-O})_{12}(\text{Htrz})_4(\text{trz})_4]$  in **3**. Packing diagrams of  $[\text{Mo}_8\text{O}_8(\mu_2\text{-O})_{12}(\text{Htrz})_8]_{1/2} \cdot [\text{Mo}_{12}\text{O}_{12}(\mu_2\text{-O})_4(\mu_3\text{-O})_{12}(\text{Htrz})_4(\text{trz})_4] \cdot 44\text{H}_2\text{O}$  (**3**) in *a* (d) and *b* (e) axes.

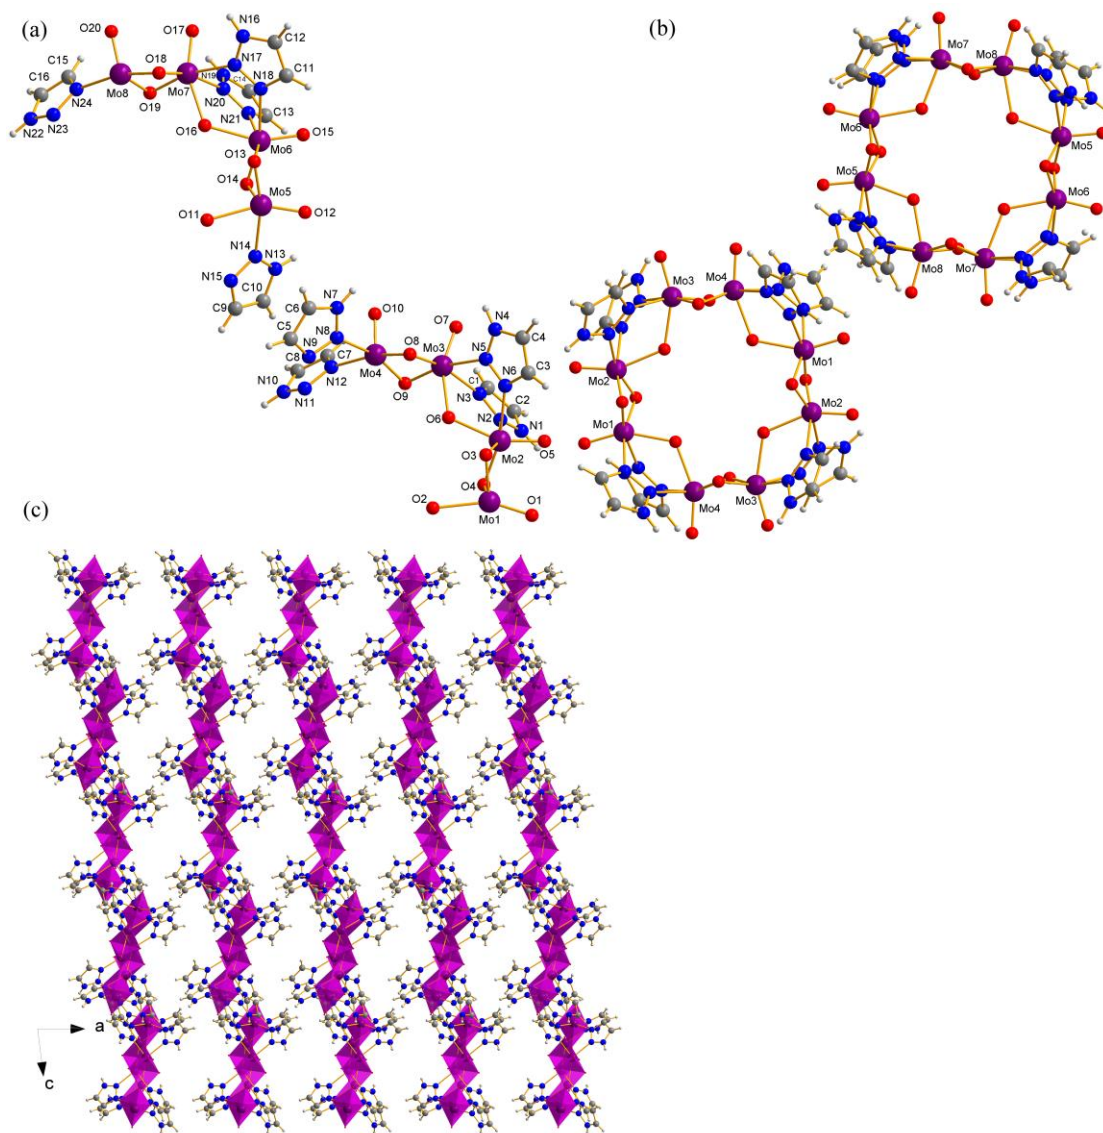

**Figure S4.** Perspective view of [Mo<sub>8</sub>O<sub>8</sub>(μ<sub>2</sub>-O)<sub>12</sub>(Htrz)<sub>8</sub>] 62H<sub>2</sub>O (**4**, a), free and disordered water molecules are omitted for clarity. (b) Holes with maximum diameter of 5.1 Å exist in each complete unit. (c) 2D layered diagram of [Mo<sub>8</sub>O<sub>8</sub>(μ<sub>2</sub>-O)<sub>12</sub>(Htrz)<sub>8</sub>] 62H<sub>2</sub>O (**4**) in *b* axis.

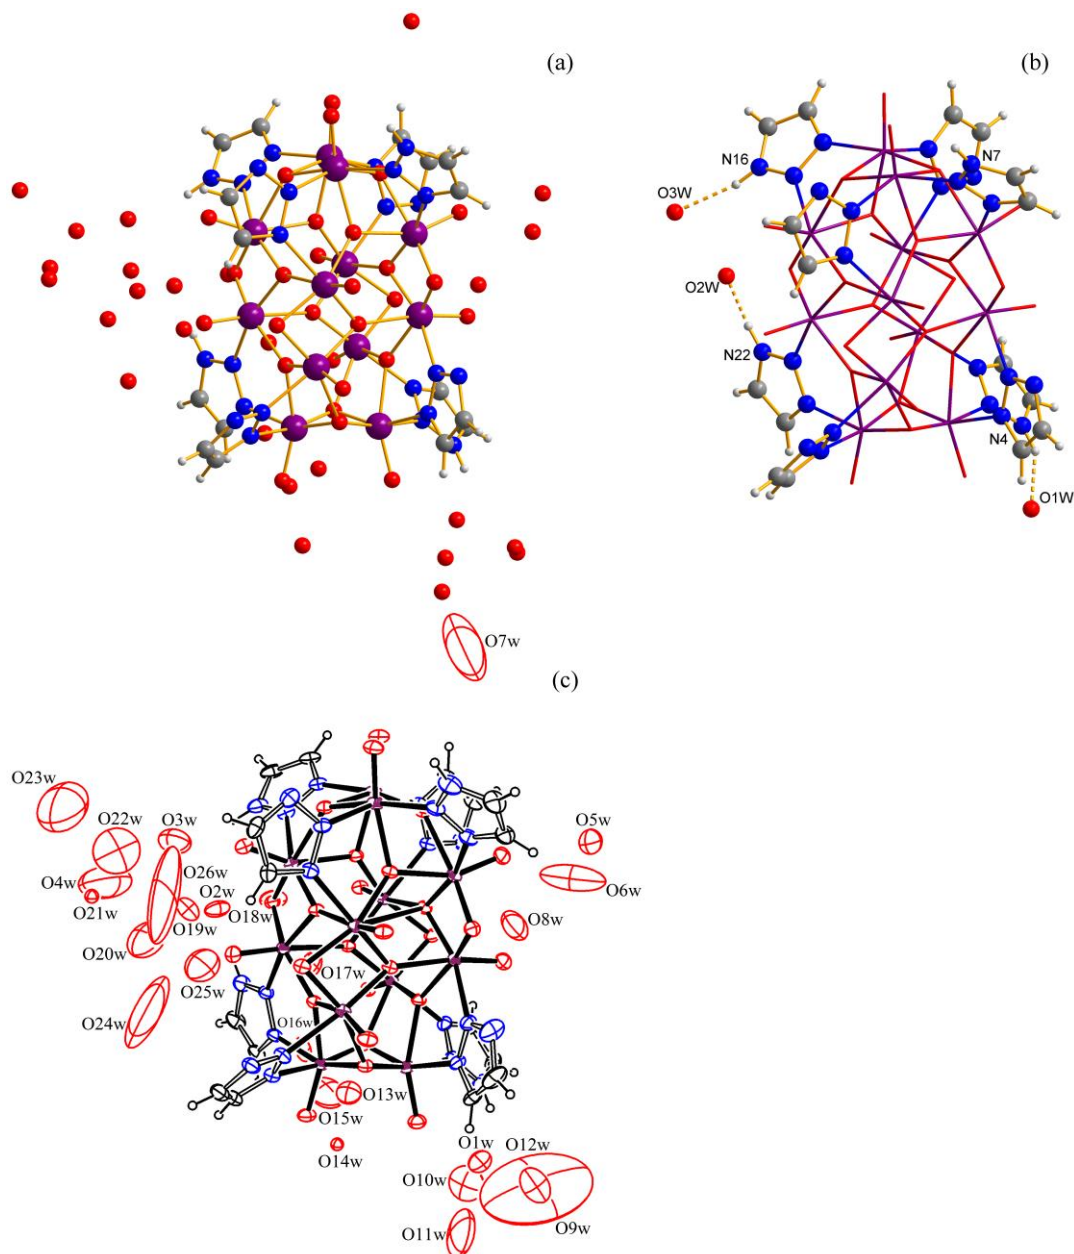

**Figure S5.** (a) Perspective view of  $[\text{Mo}_{12}\text{O}_{12}(\mu_2\text{-O})_4(\mu_3\text{-O})_{12}(\text{Htrz})_4(\text{trz})_4]\cdot 22\text{H}_2\text{O}$  (**1**) before conducting mask command. (b) Highlighted hydrogen bonds between protonated N atoms and free water molecules. (c) Perspective view of **1** before solvent mask, thermal ellipsoids are drawn by ORTEP and represent 30% probability surfaces.

Distribution of 1H-1,2,3-triazoles: two atoms which coordinated with central molybdenum are identified as nitrogen and the other three are all designated as carbon atoms in trzs. After refinements, one carbon atom has the smallest  $U_{\text{eq}}$  value compared with the other two and there is a pair of obvious Q peaks located at the left and right of its periphery, which this carbon can be further revised as nitrogen atom. There is only one far Q peak around the other two atoms, which is obviously hydrogen atom on carbon. Then hydrogen atoms on carbon atoms are generated geometrically and



refined isotropically, while hydrogen atoms on three nitrogen in eight trzs are confirmed by forming intramolecular hydrogen bonds with surrounding water molecules, namely, N16, N22 and N4 in Figure S5b. The fourth hydrogen is added by a distinct Q peak around N7 and also having hydrogen bond with free water molecular. In addition, there is no Q peak around nitrogen atoms in the other coordinated four trzs, which are all defined as deprotonated states. All hydrogen bonds in **1** before solvent mask are listed in Table S2.

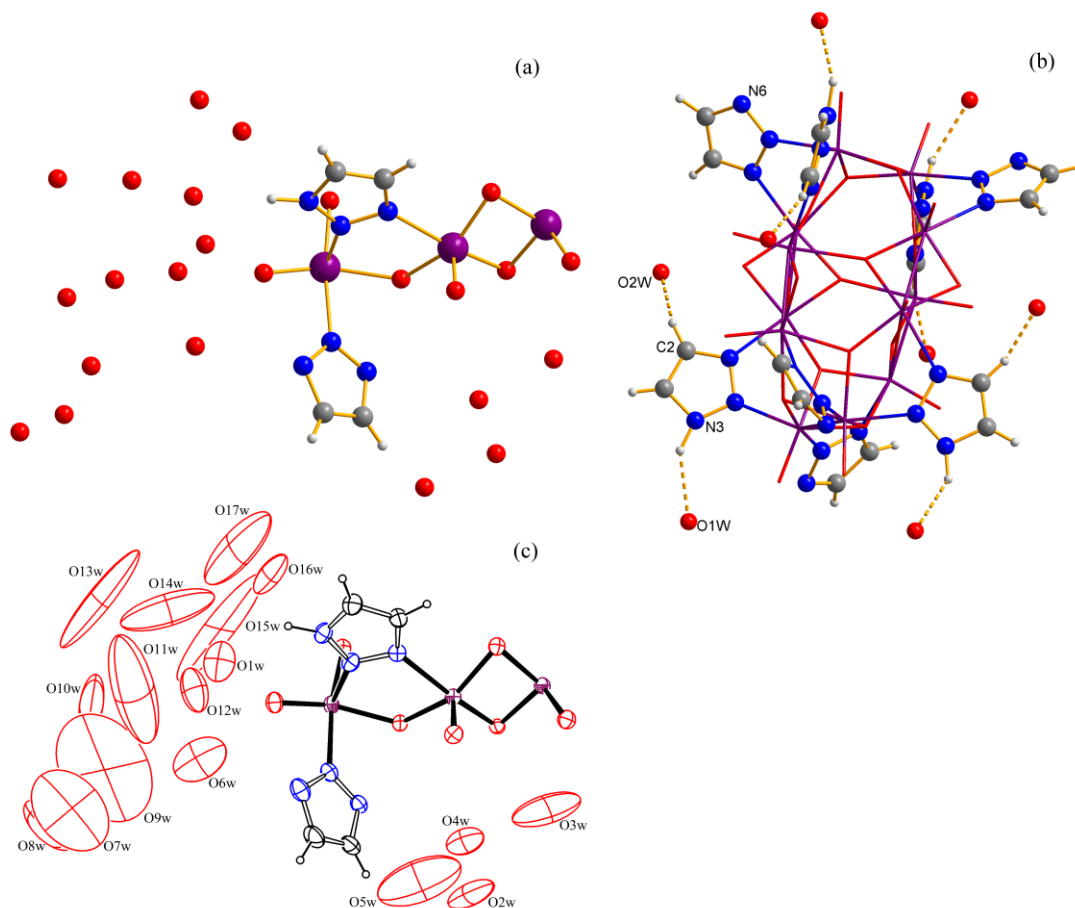

**Figure S6.** (a) Perspective view of  $[Mo_{12}O_{12}(\mu_2-O)_4(\mu_3-O)_{12}(Htrz)_4(trz)_4] \cdot 92H_2O$  (**2**) before conducting mask command. (b) Highlighted hydrogen bonds between C atoms, protonated N atoms and free water molecules. (c) Perspective view of **2** before solvent mask, thermal ellipsoids are drawn by ORTEP and represent 30% probability surfaces.

The distribution of 1H-1,2,3-triazoles in **2** is the same as **1**. Hydrogen atom on N3 in trz is confirmed through the surrounding Q peak and forming intramolecular hydrogen bond with free water molecule O1w in Figure S6b. All hydrogen bonds before solvent mask are listed in Table S3. There is no Q peak around N6, which is defined as deprotonated state and further satisfy charge conservation.

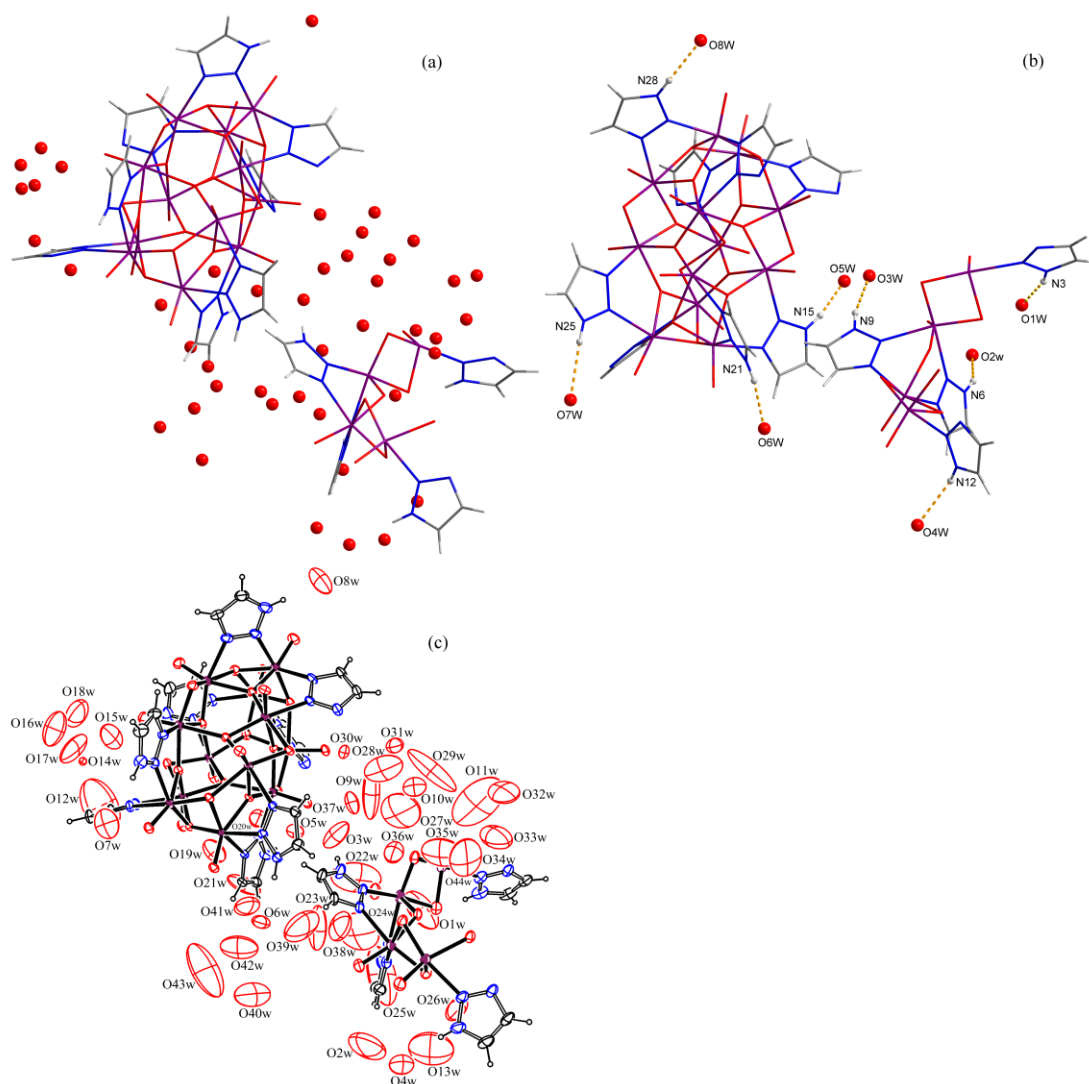

**Figure S7.** (a) Perspective view of  $[\text{Mo}_8\text{O}_8(\mu_2\text{-O})_{12}(\text{Htrz})_8]_{1/2} \cdot [\text{Mo}_{12}\text{O}_{12}(\mu_2\text{-O})_4(\mu_3\text{-O})_{12}(\text{Htrz})_4(\text{trz})_4] \cdot 44\text{H}_2\text{O}$  (**3**) before conducting mask command. (b) Highlighted hydrogen bonds between protonated N atoms and free water molecules. (c) Perspective view of **3** before solvent mask, thermal ellipsoids are drawn by ORTEP and represent 30% probability surfaces.

There are about 44 free and disordered water molecules in **3** before conducting mask command in Figure S7a. The distribution of 1H-1,2,3-triazoles in **3** is the same as **1** and **2**. Hydrogen atoms in trzs are confirmed through the surrounding Q peak, and forming intramolecular hydrogen bonds with free water molecules mainly in Figure S7b. All hydrogen bonds in **3** before solvent mask are listed in Table S4.

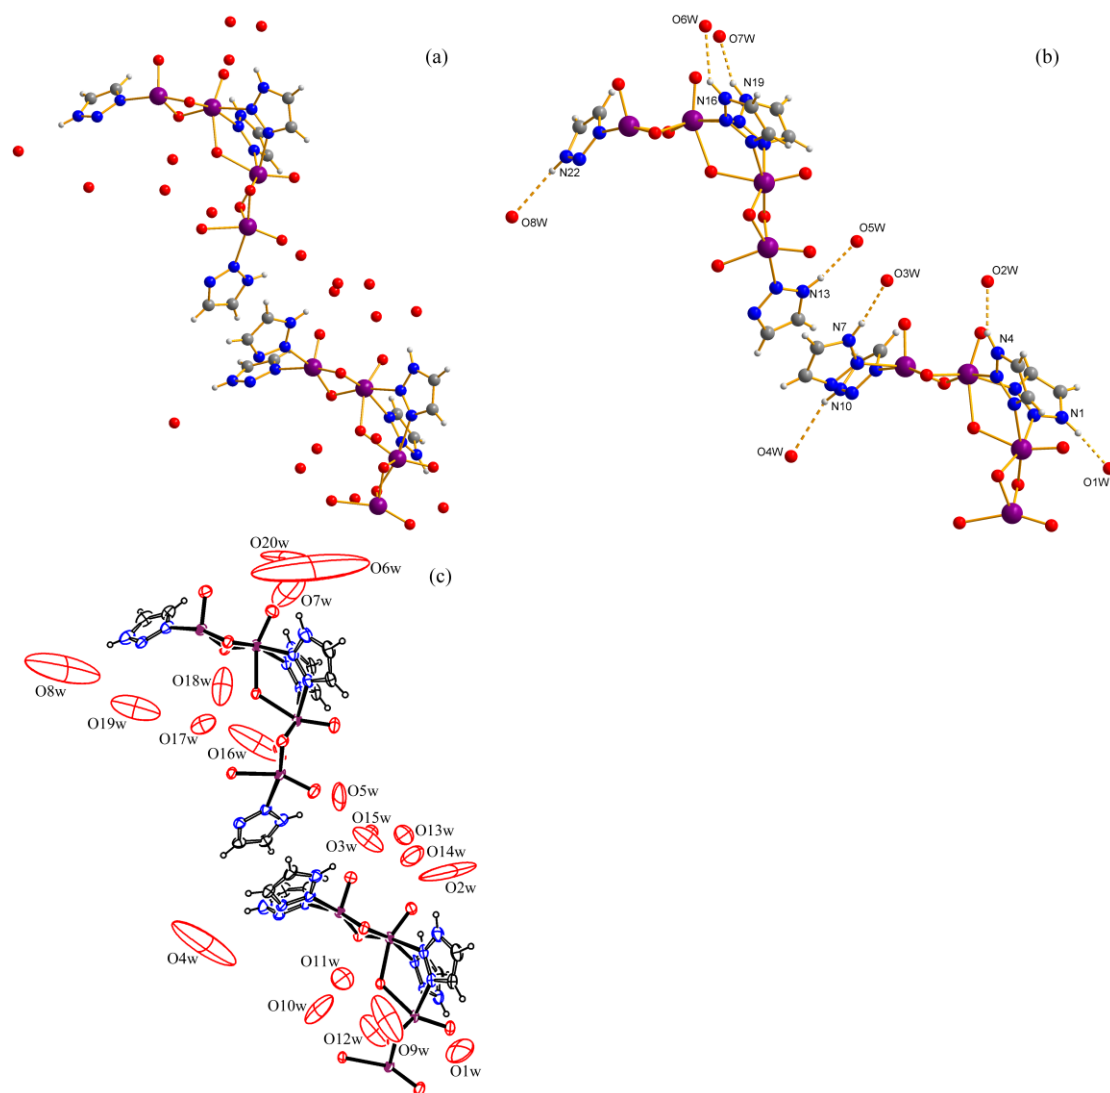

**Figure S8.** (a) Perspective view of  $[Mo_8O_8(\mu_2-O)_{12}(Htrz)_8] \cdot 62H_2O$  (**4**) before conducting mask command. (b) Highlighted hydrogen bonds between protonated N atoms and free water molecules. (c) Perspective view of **4** before solvent mask, thermal ellipsoids are drawn by ORTEP and represent 30% probability surfaces.

The distribution of 1H-1,2,3-triazoles in **4** is the same as **1** ~ **3**. Hydrogen atoms on all N atoms in trzs are confirmed through forming intramolecular hydrogen bonds with free water molecules in Figure S7b. All hydrogen bonds before solvent mask are listed in Table S5.

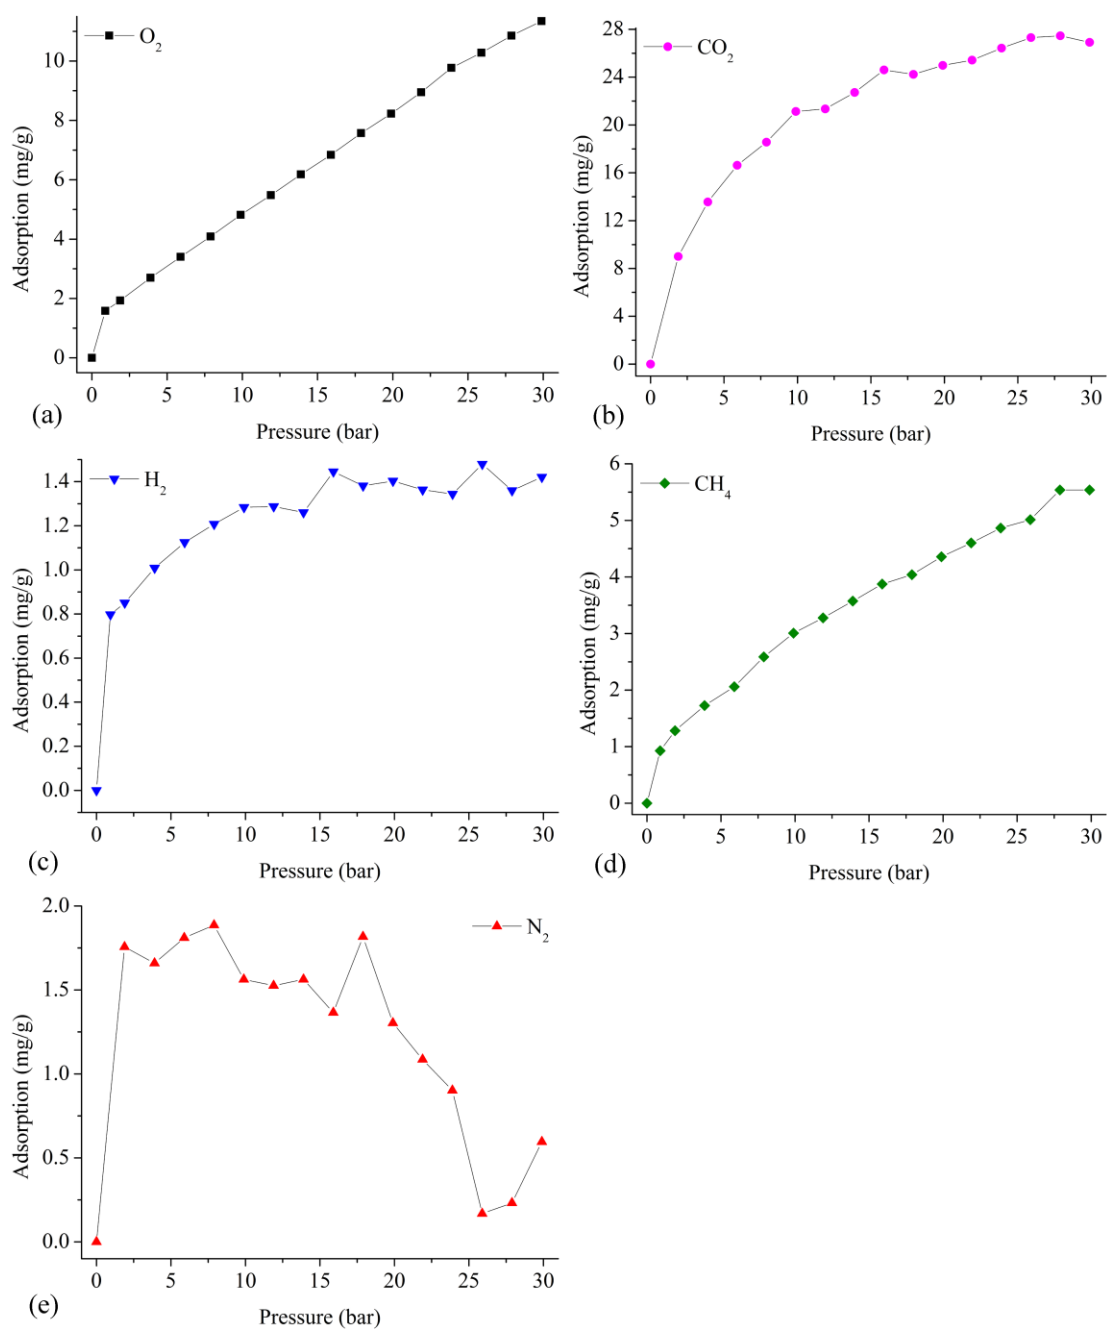

**Figure S9.** Gases adsorption isotherms of  $[Mo_{12}O_{12}(\mu_2-O)_4(\mu_3-O)_{12}(Htrz)_4(trz)_4] \cdot 22H_2O$  (**1**) at 298 K at different pressures for  $O_2$  (a),  $CO_2$  (b),  $H_2$  (c),  $CH_4$  (d),  $N_2$  (e) respectively.

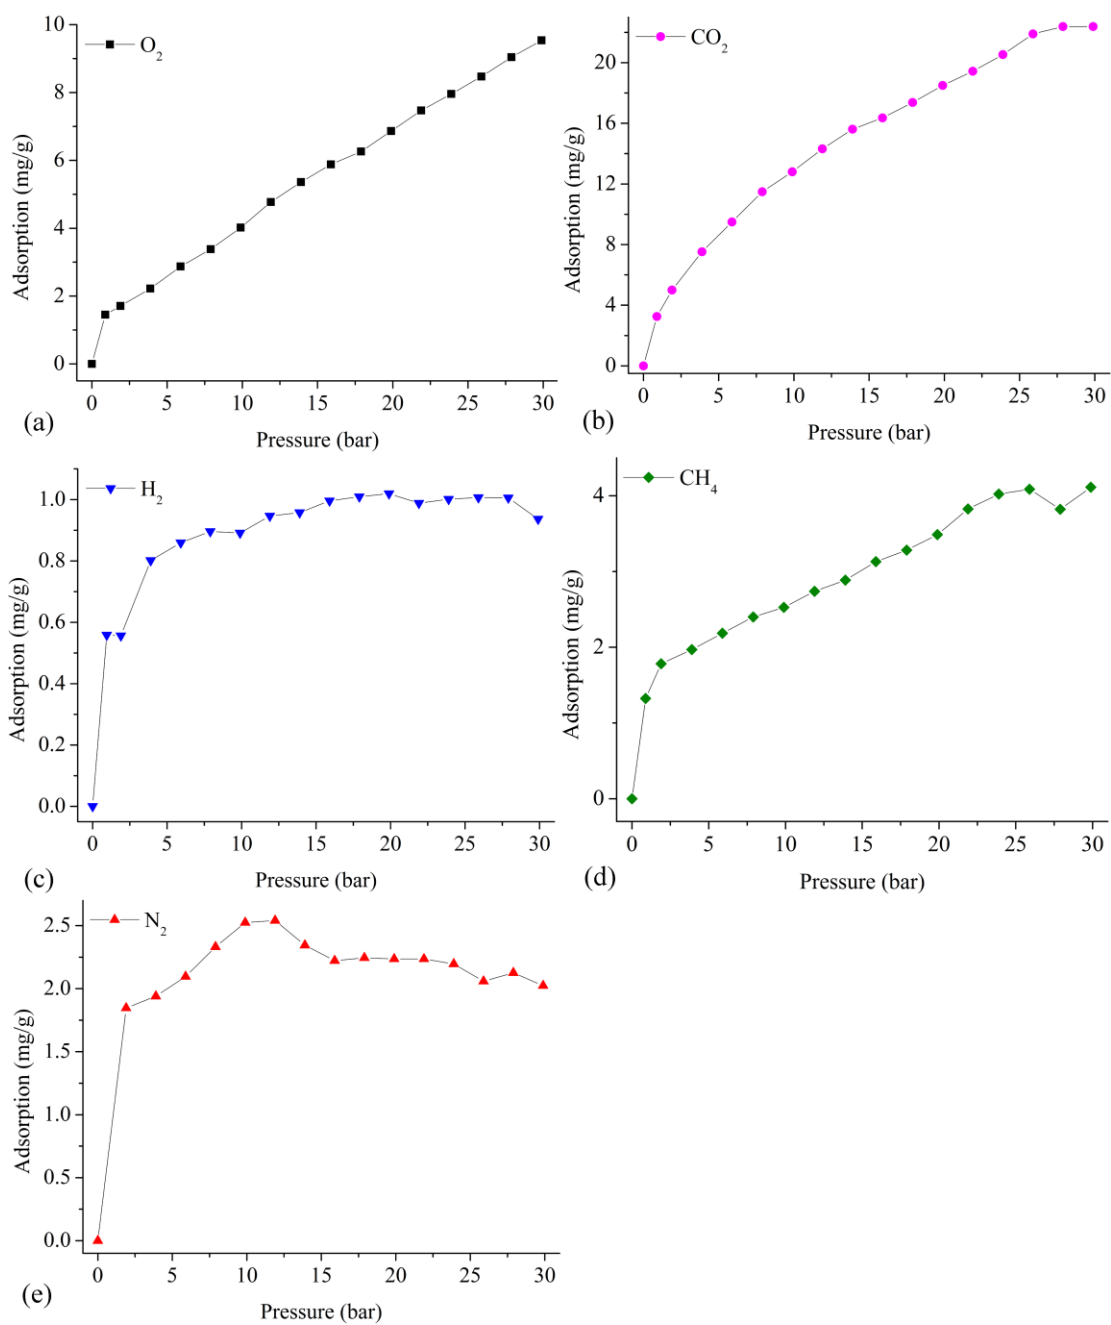

**Figure S10.** Gases adsorption isotherms of  $[Mo_{12}O_{12}(\mu_2-O)_4(\mu_3-O)_{12}(Htrz)_4(trz)_4] \cdot 92H_2O$  (**2**) at 298 K at different pressures for  $O_2$  (a),  $CO_2$  (b),  $H_2$  (c),  $CH_4$  (d),  $N_2$  (e) respectively.

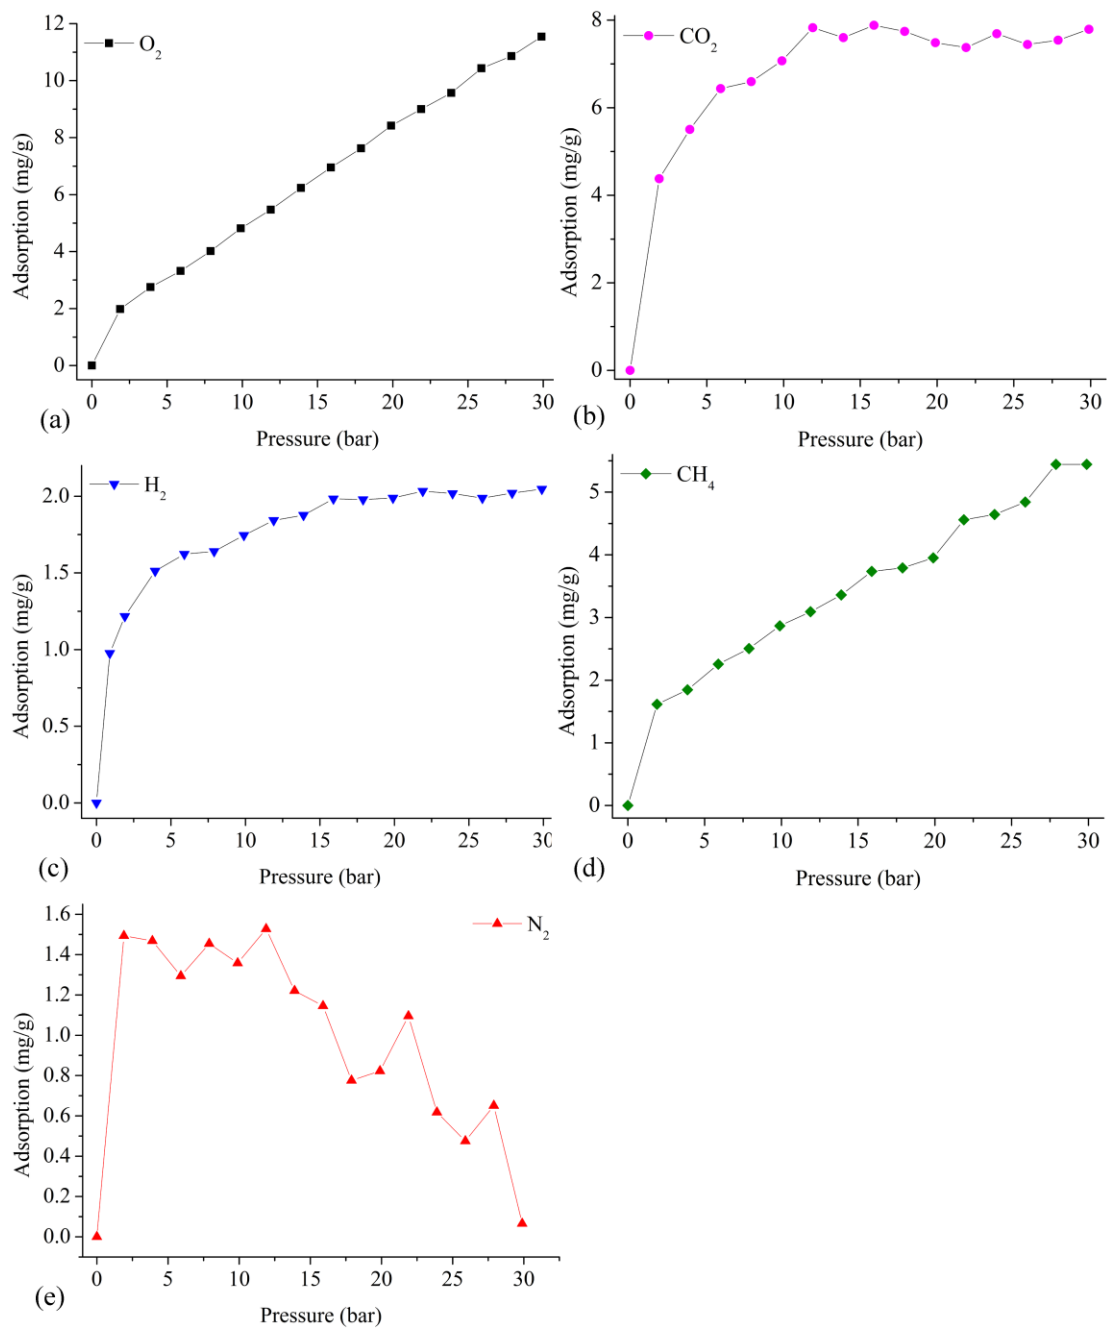

**Figure S11.** Gases adsorption isotherms of  $[\text{Mo}_8\text{O}_8(\mu_2\text{-O})_{12}(\text{Htrz})_8] \cdot 62\text{H}_2\text{O}$  (4) at 298 K at different pressures for  $\text{O}_2$  (a),  $\text{CO}_2$  (b),  $\text{H}_2$  (c),  $\text{CH}_4$  (d),  $\text{N}_2$  (e) respectively.

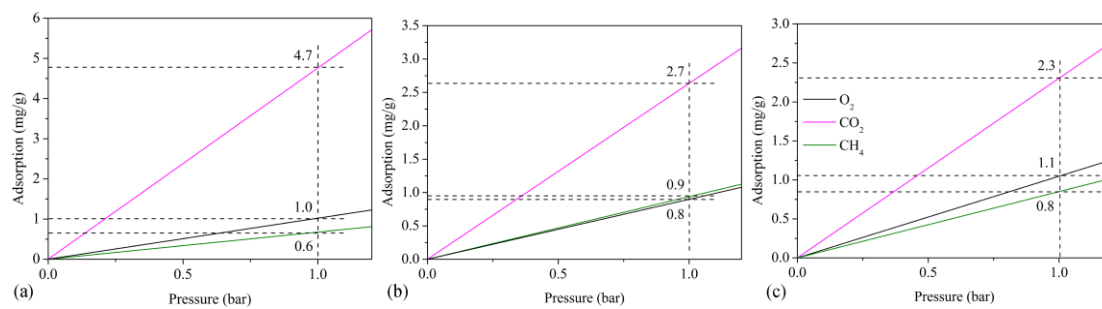

**Figure S12.**  $O_2$ ,  $CO_2$  and  $CH_4$  adsorption isotherms for **1**, **2** and **4** (a ~ c) respectively at 298 K and pressures of up to 1 bar.



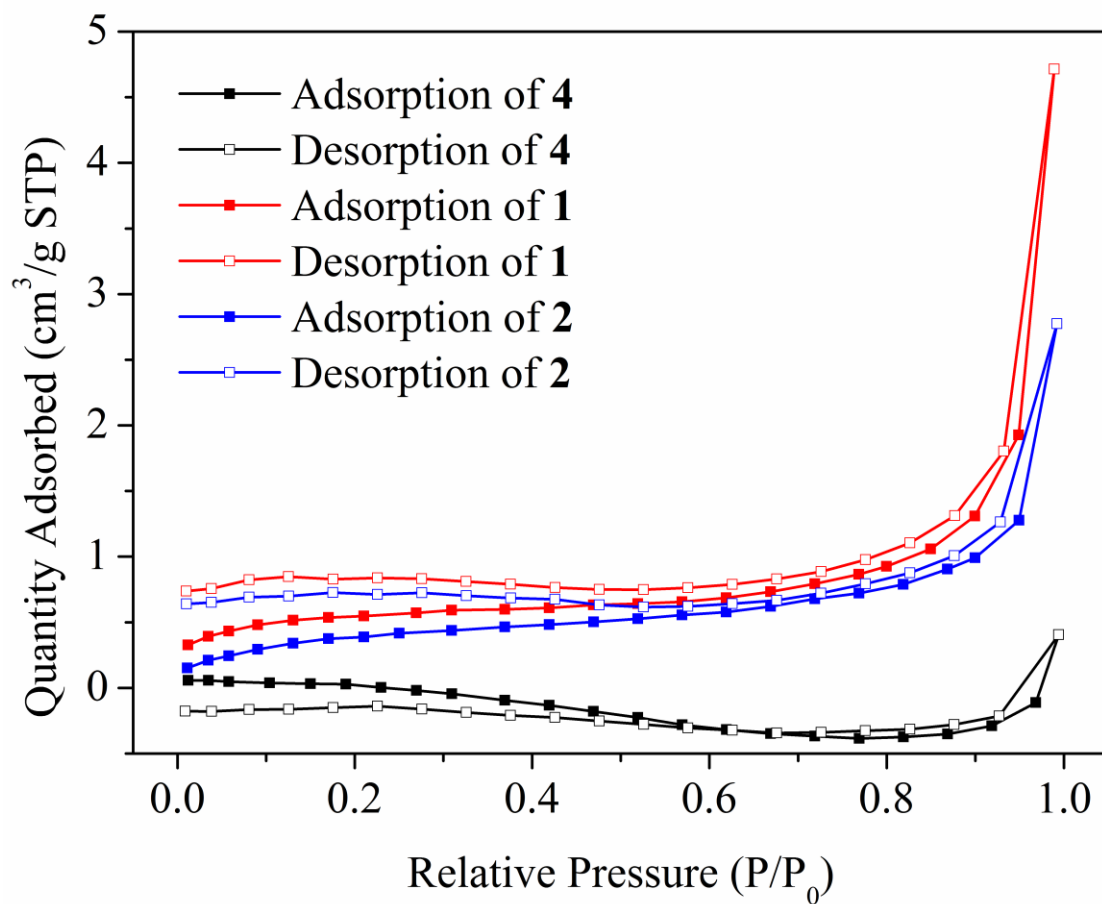

**Figure S13.** N<sub>2</sub> adsorption–desorption isotherms of **1**, **2** and **4** at 77 K respectively.

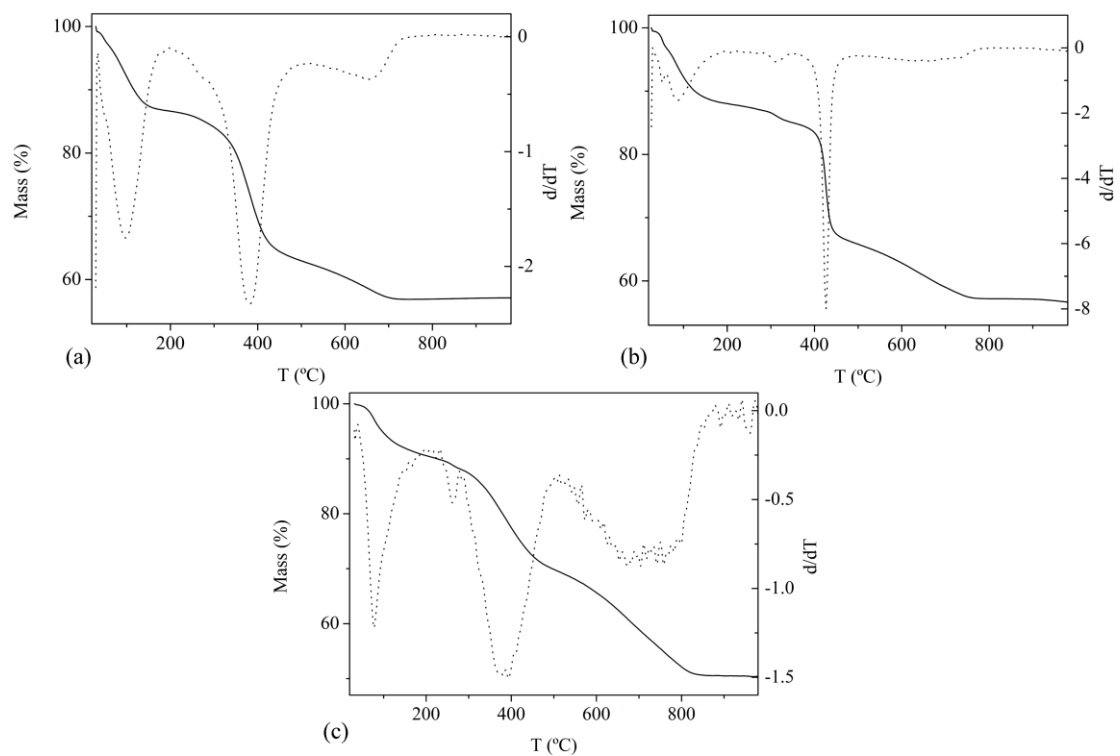

**Figure S14.** (a) TGA of  $[\text{Mo}_{12}\text{O}_{12}(\mu_2\text{-O})_4(\mu_3\text{-O})_{12}(\text{Htrz})_4(\text{trz})_4]\cdot 22\text{H}_2\text{O}$  (**1**); (b) TGA of  $[\text{Mo}_{12}\text{O}_{12}(\mu_2\text{-O})_4(\mu_3\text{-O})_{12}(\text{Htrz})_4(\text{trz})_4]\cdot 92\text{H}_2\text{O}$  (**2**); (c) TGA of  $[\text{Mo}_8\text{O}_8(\mu_2\text{-O})_{12}(\text{Htrz})_8] 62\text{H}_2\text{O}$  (**4**) respectively.

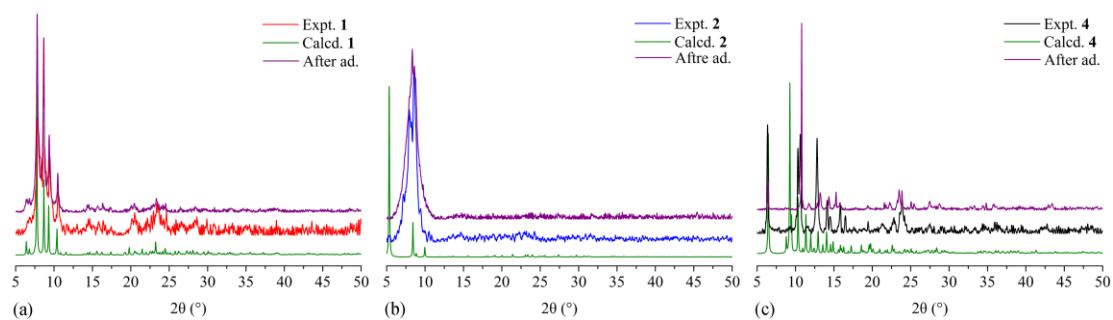

**Figure S15.** Powder XRD curves for  $[\text{Mo}_{12}\text{O}_{12}(\mu_2\text{-O})_4(\mu_3\text{-O})_{12}(\text{Htrz})_4(\text{trz})_4]\cdot n\text{H}_2\text{O}$  ( $n = 22$ , **1**;  $n = 92$ , **2**) and  $[\text{Mo}_8\text{O}_8(\mu_2\text{-O})_{12}(\text{Htrz})_8]\cdot 62\text{H}_2\text{O}$  (**4**) under different circumstances respectively.

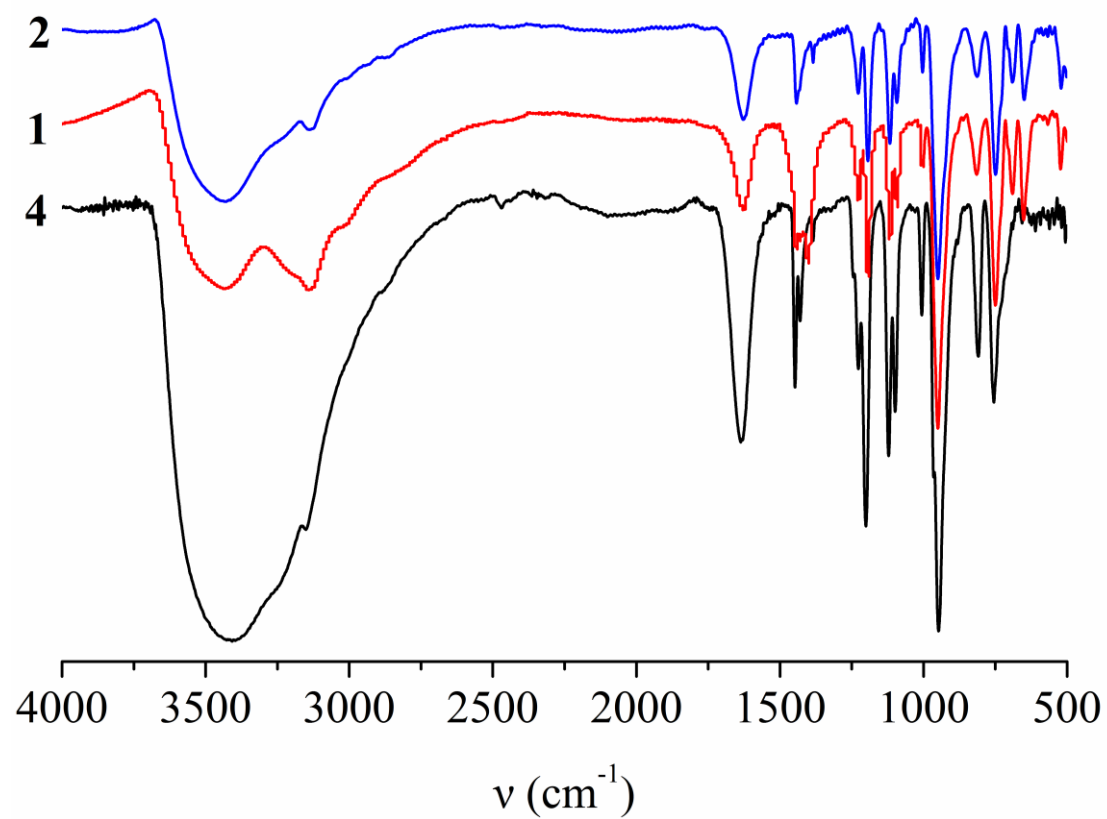

**Figure S16.** IR spectra of  $[\text{Mo}_{12}\text{O}_{12}(\mu_2\text{-O})_4(\mu_3\text{-O})_{12}(\text{Htrz})_4(\text{trz})_4] \cdot n\text{H}_2\text{O}$  ( $n = 22$ , **1**;  $n = 92$ , **2**) and  $[\text{Mo}_8\text{O}_8(\mu_2\text{-O})_{12}(\text{Htrz})_8] \cdot 62\text{H}_2\text{O}$  (**4**) respectively.

**1H-1,2,3-triazole**Molecular Formula: C<sub>2</sub>H<sub>3</sub>N<sub>3</sub>

SDBS No.: 41390

Spectral Code: IR2009-87430TK

CAS Registry No: 288-36-8

IR: Liquid film

DOI:

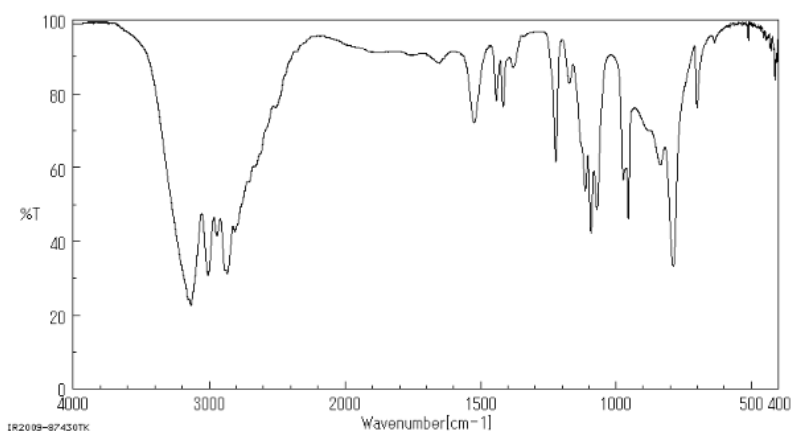**Wave number (cm<sup>-1</sup>) and Transmittance (T%)**

|      |    |      |    |      |    |     |    |
|------|----|------|----|------|----|-----|----|
| 3134 | 23 | 1524 | 72 | 1114 | 54 | 836 | 61 |
| 3008 | 31 | 1443 | 78 | 1092 | 42 | 788 | 33 |
| 2943 | 42 | 1417 | 77 | 1070 | 49 | 701 | 76 |
| 2865 | 31 | 1223 | 62 | 973  | 57 | 511 | 94 |
| 1652 | 88 | 1172 | 83 | 954  | 46 |     |    |

**Figure S17.** FT-IR spectrum of 1H-1,2,3-triazole [C<sub>2</sub>H<sub>3</sub>N<sub>3</sub>] originated from Spectral Database for Organic Compounds SDDBS. URL for this compound: <https://sdbs.db.aist.go.jp/sdbs/cgi-bin/landingpage?sdbno=41390>.

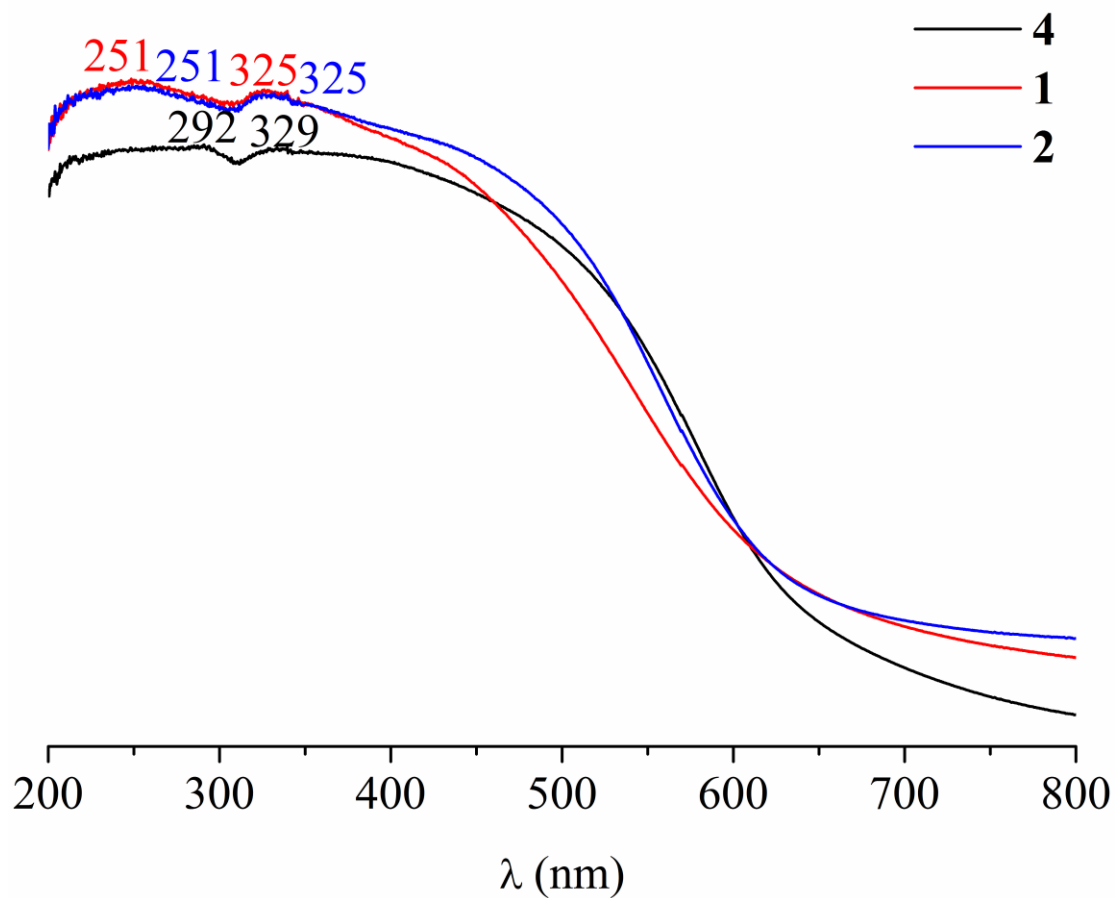

**Figure S18.** Diffused reflectance spectra of solid  $[\text{Mo}_{12}\text{O}_{12}(\mu_2\text{-O})_4(\mu_3\text{-O})_{12}(\text{Htrz})_4(\text{trz})_4] \cdot n\text{H}_2\text{O}$  ( $n = 22$ , **1**;  $n = 92$ , **2**) and  $[\text{Mo}_8\text{O}_8(\mu_2\text{-O})_{12}(\text{Htrz})_8] \cdot 62\text{H}_2\text{O}$  (**4**) respectively.

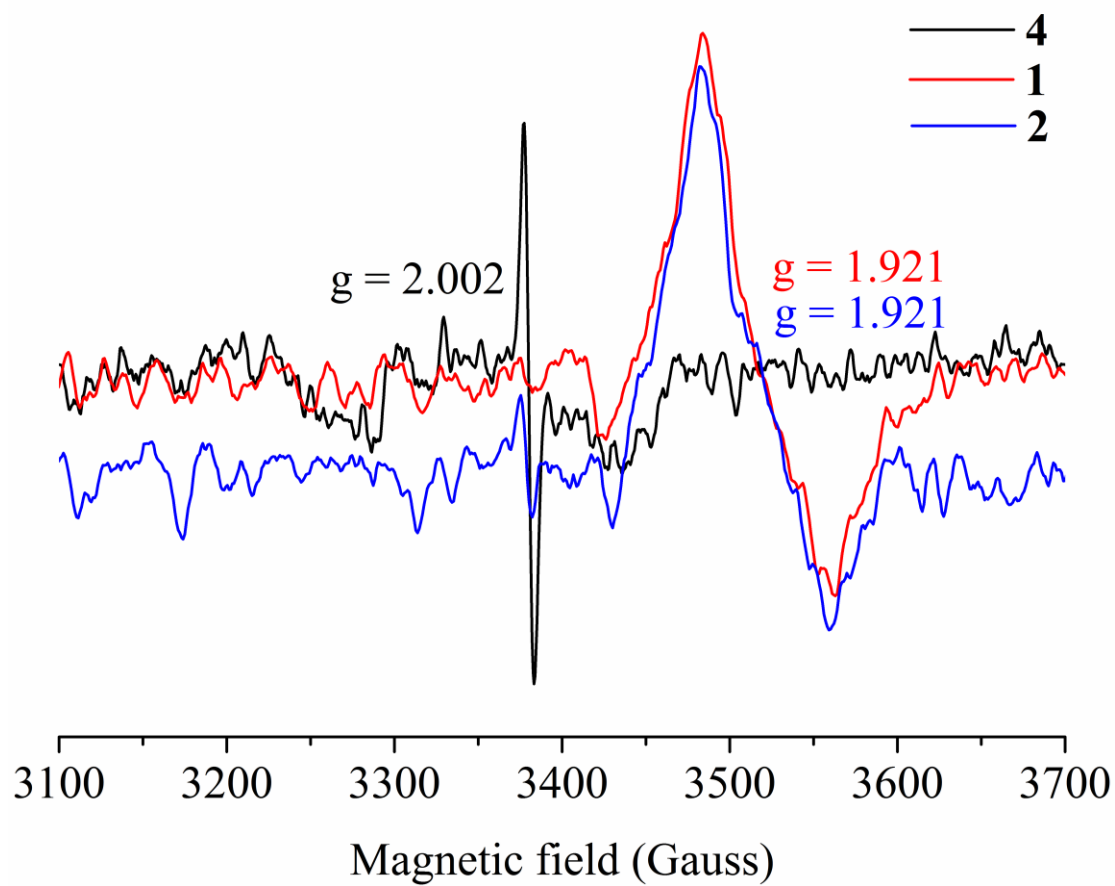

**Figure S19.** EPR spectra of solid **1**, **2** and **4** at 100 K respectively.

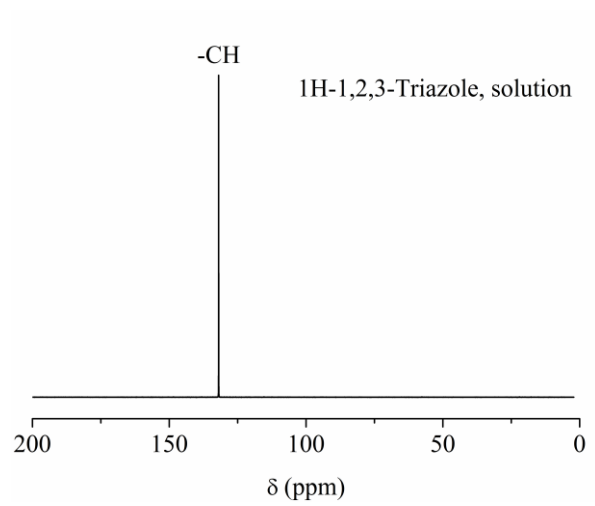

**Figure S20.** Solution  $^{13}\text{C}$  NMR spectrum of pure trz.



**Table S1.** Crystallographic data and structural refinements for complexes  $[\text{Mo}_{12}\text{O}_{12}(\mu_2\text{-O})_4(\mu_3\text{-O})_{12}(\text{Htrz})_4(\text{trz})_4]\cdot n\text{H}_2\text{O}$  ( $n = 22$ , **1**;  $n = 92$ , **2**),  $[\text{Mo}_8\text{O}_8(\mu_2\text{-O})_{12}(\text{Htrz})_8]_{1/2}\cdot[\text{Mo}_{12}\text{O}_{12}(\mu_2\text{-O})_4(\mu_3\text{-O})_{12}(\text{Htrz})_4(\text{trz})_4]\cdot 44\text{H}_2\text{O}$  (**3**) and  $[\text{Mo}_8\text{O}_8(\mu_2\text{-O})_{12}(\text{Htrz})_8]\cdot 62\text{H}_2\text{O}$  (**4**) respectively.

| Identification codes                          | <b>1</b>                                                             | <b>2</b>                                                               | <b>3</b>                                                              | <b>4</b>                                                               |
|-----------------------------------------------|----------------------------------------------------------------------|------------------------------------------------------------------------|-----------------------------------------------------------------------|------------------------------------------------------------------------|
| Empirical formula                             | $\text{C}_{16}\text{H}_{64}\text{Mo}_{12}\text{N}_{24}\text{O}_{50}$ | $\text{C}_{16}\text{H}_{204}\text{Mo}_{12}\text{N}_{24}\text{O}_{120}$ | $\text{C}_{24}\text{H}_{120}\text{Mo}_{16}\text{N}_{36}\text{O}_{82}$ | $\text{C}_{32}\text{H}_{172}\text{Mo}_{16}\text{N}_{48}\text{O}_{102}$ |
| Formula weight                                | 2544.1                                                               | 3805.2                                                                 | 3759.9                                                                | 4396.2                                                                 |
| Temperature/K                                 | 99.8(8)                                                              | 99.9(8)                                                                | 150.0(1)                                                              | 100.0(1)                                                               |
| Crystal system                                | monoclinic                                                           | tetragonal                                                             | triclinic                                                             | triclinic                                                              |
| Space group                                   | $P 2_1/n$                                                            | $I 4_1/a$                                                              | $P \bar{1}$                                                           | $P \bar{1}$                                                            |
| $a/\text{\AA}$                                | 17.2669(2)                                                           | 20.8003(2)                                                             | 13.5876(1)                                                            | 9.7472(1)                                                              |
| $b/\text{\AA}$                                | 20.0855(3)                                                           | 20.8003(2)                                                             | 19.1998(2)                                                            | 18.7620(2)                                                             |
| $c/\text{\AA}$                                | 19.2031(3)                                                           | 26.7130(5)                                                             | 21.9901(2)                                                            | 20.4530(2)                                                             |
| $\alpha/^\circ$                               | 90                                                                   | 90                                                                     | 72.4920(1)                                                            | 89.8000(1)                                                             |
| $\beta/^\circ$                                | 98.7530(1)                                                           | 90                                                                     | 79.1170(1)                                                            | 82.5470(1)                                                             |
| $\gamma/^\circ$                               | 90                                                                   | 90                                                                     | 85.7130(1)                                                            | 83.1880(1)                                                             |
| Volume/ $\text{\AA}^3$                        | 6582.35(2)                                                           | 11557.4(3)                                                             | 5371.62(9)                                                            | 3682.33(7)                                                             |
| $Z$                                           | 4                                                                    | 4                                                                      | 2                                                                     | 1                                                                      |
| $\rho_{\text{calc}}/\text{g/cm}^3$            | 2.167                                                                | 1.234                                                                  | 1.835                                                                 | 1.479                                                                  |
| $\mu/\text{mm}^{-1}$                          | 18.797                                                               | 10.705                                                                 | 15.398                                                                | 11.324                                                                 |
| $F(000)$                                      | 4048.0                                                               | 4048.0                                                                 | 2808.0                                                                | 1568.0                                                                 |
| Crystal size/ $\text{mm}^3$                   | $0.3 \times 0.15 \times 0.1$                                         | $0.4 \times 0.2 \times 0.1$                                            | $0.3 \times 0.2 \times 0.1$                                           | $0.1 \times 0.08 \times 0.02$                                          |
| Radiation                                     | Cu $K\alpha$ ( $\lambda = 1.54184$ )                                 | Cu $K\alpha$ ( $\lambda = 1.54184$ )                                   | Cu $K\alpha$ ( $\lambda = 1.54184$ )                                  | Cu $K\alpha$ ( $\lambda = 1.54184$ )                                   |
| $2\theta$ range for data collection/ $^\circ$ | 6.408 to 159.704                                                     | 5.384 to 134.994                                                       | 4.28 to 148.892                                                       | 4.358 to 157.224                                                       |

|                                                         |                                                                                  |                                                                                 |                                                                                  |                                                                                  |
|---------------------------------------------------------|----------------------------------------------------------------------------------|---------------------------------------------------------------------------------|----------------------------------------------------------------------------------|----------------------------------------------------------------------------------|
| Index ranges                                            | -19 ≤ <i>h</i> ≤ 22,<br>-25 ≤ <i>k</i> ≤ 22,<br>-24 ≤ <i>l</i> ≤ 23              | -18 ≤ <i>h</i> ≤ 24,<br>-24 ≤ <i>k</i> ≤ 23,<br>-32 ≤ <i>l</i> ≤ 32             | -16 ≤ <i>h</i> ≤ 16,<br>-23 ≤ <i>k</i> ≤ 22,<br>-27 ≤ <i>l</i> ≤ 27              | -12 ≤ <i>h</i> ≤ 12,<br>-23 ≤ <i>k</i> ≤ 23,<br>-25 ≤ <i>l</i> ≤ 17              |
| Reflections collected                                   | 50482                                                                            | 20237                                                                           | 141603                                                                           | 67878                                                                            |
| Independent reflections                                 | 14046 [ <i>R</i> <sub>int</sub> = 0.0501,<br><i>R</i> <sub>sigma</sub> = 0.0451] | 5123 [ <i>R</i> <sub>int</sub> = 0.0413,<br><i>R</i> <sub>sigma</sub> = 0.0310] | 21272 [ <i>R</i> <sub>int</sub> = 0.0809,<br><i>R</i> <sub>sigma</sub> = 0.0383] | 15575 [ <i>R</i> <sub>int</sub> = 0.0288,<br><i>R</i> <sub>sigma</sub> = 0.0208] |
| Data/restraints/parameters                              | 14046/0/721                                                                      | 5123/0/185                                                                      | 21272/0/1027                                                                     | 15575/0/613                                                                      |
| Goodness-of-fit on <i>F</i> <sup>2</sup>                | 1.036                                                                            | 1.040                                                                           | 1.110                                                                            | 1.031                                                                            |
| Final <i>R</i> indexes [ <i>I</i> ≥ 2σ<br>( <i>I</i> )] | <i>R</i> <sub>1</sub> = 0.0400,<br><i>wR</i> <sub>2</sub> = 0.1057               | <i>R</i> <sub>1</sub> = 0.0439,<br><i>wR</i> <sub>2</sub> = 0.1259              | <i>R</i> <sub>1</sub> = 0.0556,<br><i>wR</i> <sub>2</sub> = 0.1370               | <i>R</i> <sub>1</sub> = 0.0501,<br><i>wR</i> <sub>2</sub> = 0.1393               |
| Final <i>R</i> indexes [all data]                       | <i>R</i> <sub>1</sub> = 0.0440,<br><i>wR</i> <sub>2</sub> = 0.1087               | <i>R</i> <sub>1</sub> = 0.0526,<br><i>wR</i> <sub>2</sub> = 0.1312              | <i>R</i> <sub>1</sub> = 0.0617,<br><i>wR</i> <sub>2</sub> = 0.1424               | <i>R</i> <sub>1</sub> = 0.0514,<br><i>wR</i> <sub>2</sub> = 0.1404               |
| Largest diff.<br>peak/hole/e Å <sup>-3</sup>            | 1.30/-1.17                                                                       | 1.15/-0.85                                                                      | 1.57/-1.02                                                                       | 3.42/-1.37                                                                       |

**Table S2.** Hydrogen bond distances ( Å ) and angles ( ° ) in [Mo<sub>12</sub>O<sub>12</sub>(μ<sub>2</sub>-O)<sub>4</sub>(μ<sub>3</sub>-O)<sub>12</sub>(Htrz)<sub>4</sub>(trz)<sub>4</sub>]**·**22H<sub>2</sub>O (**1**) before solvent mask.

| D–H ⋯ A         | D–H(Å) | H ⋯ A(Å) | D ⋯ A(Å) | D–H ⋯ A( ° ) |
|-----------------|--------|----------|----------|--------------|
| N4–H4 ⋯ O1w     | 0.88   | 1.77     | 2.576(2) | 150          |
| N7–H7 ⋯ O4wa    | 0.88   | 2.23     | 3.02(4)  | 150          |
| N16–H16 ⋯ O3w   | 0.88   | 2.00     | 2.861(2) | 167          |
| N22–H22 ⋯ O2w   | 0.88   | 1.62     | 2.490(1) | 168          |
| C1–H1 ⋯ O5wb    | 0.95   | 2.31     | 3.254(2) | 176          |
| C4–H4A ⋯ O4c    | 0.95   | 2.56     | 3.370(1) | 144          |
| C5–H5 ⋯ O1wd    | 0.95   | 1.65     | 2.557(2) | 158          |
| C7–H7A ⋯ O2e    | 0.95   | 2.57     | 3.497(1) | 165          |
| C8–H8 ⋯ O9e     | 0.95   | 2.56     | 3.495(1) | 168          |
| C9–H9 ⋯ O25w    | 0.95   | 2.55     | 3.38(2)  | 146          |
| C11–H11 ⋯ O5we  | 0.95   | 2.22     | 3.17(2)  | 177          |
| C14–H14 ⋯ O11f  | 0.95   | 2.56     | 3.276(1) | 133          |
| C16–H16A ⋯ O24g | 0.95   | 2.43     | 3.208(1) | 139          |

Symmetric codes: (a)  $\frac{1}{2} - x, -\frac{1}{2} + y, \frac{3}{2} - z$ ; (b)  $\frac{1}{2} - x, \frac{1}{2} + y, \frac{1}{2} - z$ ; (c)  $1 - x, 1 - y, 1 - z$ ; (d)  $\frac{1}{2} - x, -\frac{1}{2} + y, \frac{1}{2} - z$ ; (e)  $1 - x, -y, 1 - z$ ; (f)  $-x, 1 - y, 1 - z$ ; (g)  $\frac{1}{2} - x, \frac{1}{2} + y, \frac{3}{2} - z$ .

**Table S3.** Hydrogen bond distances ( Å ) and angles ( ° ) in  $[\text{Mo}_{12}\text{O}_{12}(\mu_2\text{-O})_4(\mu_3\text{-O})_{12}(\text{Htrz})_4(\text{trz})_4]\cdot 92\text{H}_2\text{O}$  (**2**) before solvent mask.

| D–H ⋯ A      | D–H(Å) | H ⋯ A(Å) | D ⋯ A(Å) | D–H ⋯ A( ° ) |
|--------------|--------|----------|----------|--------------|
| N3–H3 ⋯ O1w  | 1.02   | 2.15     | 3.011(2) | 142          |
| C2–H2 ⋯ O2wa | 0.95   | 1.90     | 2.80(3)  | 157          |

Symmetric codes: (a)  $-1/4 + y, 5/4 - x, 5/4 - z$ .

**Table S4.** Hydrogen bond distances ( Å ) and angles ( ° ) in  $[\text{Mo}_8\text{O}_8(\mu_2\text{-O})_{12}(\text{Htrz})_8]_{1/2} \cdot [\text{Mo}_{12}\text{O}_{12}(\mu_2\text{-O})_4(\mu_3\text{-O})_{12}(\text{Htrz})_4(\text{trz})_4] \cdot 44\text{H}_2\text{O}$  (**3**) before solvent mask.

| D–H ⋯ A         | D–H(Å) | H ⋯ A(Å) | D ⋯ A(Å) | D–H ⋯ A(°) |
|-----------------|--------|----------|----------|------------|
| N3–H3 ⋯ O1w     | 0.86   | 2.23     | 3.07(5)  | 165        |
| N6–H6A ⋯ O2w    | 0.86   | 2.6      | 3.39(6)  | 154        |
| N9–H9A ⋯ O3w    | 0.86   | 2.27     | 3.11(2)  | 166        |
| N12–H12A ⋯ O4w  | 0.86   | 2.2      | 2.90(4)  | 139        |
| N15–H15 ⋯ O5w   | 0.86   | 1.71     | 2.544(1) | 164        |
| N21–H21 ⋯ O6w   | 0.86   | 1.99     | 2.846(1) | 170        |
| N25–H25 ⋯ O7w   | 0.86   | 2.32     | 3.17(2)  | 167        |
| N28–H28 ⋯ O8w   | 0.86   | 2.05     | 2.88(3)  | 163        |
| C7–H7 ⋯ O38a    | 0.93   | 2.53     | 3.453(1) | 173        |
| C8–H8 ⋯ O9wb    | 0.93   | 2.51     | 3.33(5)  | 148        |
| C9–H9 ⋯ O21c    | 0.93   | 2.51     | 3.403(1) | 162        |
| C10–H10 ⋯ O17c  | 0.93   | 2.57     | 3.490(1) | 168        |
| C10–H10 ⋯ O36c  | 0.93   | 2.59     | 3.190(9) | 123        |
| C15–H15A ⋯ O19d | 0.93   | 2.5      | 3.403(1) | 163        |
| C17–H17 ⋯ O10we | 0.93   | 2.41     | 3.172(2) | 139        |
| C17–H17 ⋯ O11we | 0.93   | 2.4      | 3.25(1)  | 151        |
| C21–H21A ⋯ O12w | 0.93   | 2.48     | 3.40(9)  | 172        |
| C23–H23 ⋯ O13wf | 0.93   | 2.42     | 3.18(7)  | 139        |

Symmetric codes: (a)  $1 + x, y, -1 + z$ ; (b)  $1 - x, 2 - y, -z$ ; (c)  $1 - x, 1 - y, 1 - z$ ; (d)  $-x, 2 - y, 1 - z$ ; (e)  $1 - x, 2 - y, 1 - z$ ; (f)  $-1 + x, y, 1 + z$ .

**Table S5.** Hydrogen bond distances ( Å ) and angles ( ° ) in [Mo<sub>8</sub>O<sub>8</sub>(μ<sub>2</sub>-O)<sub>12</sub>(Htrz)<sub>8</sub>] 62H<sub>2</sub>O (**4**) before solvent mask.

| D-H ...A       | D-H(Å) | H ...A(Å) | D ...A(Å) | D-H ...A( ° ) |
|----------------|--------|-----------|-----------|---------------|
| N1-H1 ...O1w   | 0.88   | 1.86      | 2.732(1)  | 174           |
| N4-H4 ...O2w   | 0.88   | 2.11      | 2.902(1)  | 149           |
| N7-H7 ...O3w   | 0.88   | 2         | 2.867(2)  | 171           |
| N10-H10 ...O4w | 0.88   | 2.54      | 3.353(2)  | 153           |
| N13-H13 ...O5w | 0.88   | 2.02      | 2.893(1)  | 170           |
| N16-H16 ...O6w | 0.88   | 2.23      | 2.948(1)  | 138           |
| N19-H19 ...O7w | 0.88   | 1.95      | 2.783(1)  | 157           |
| N22-H22 ...O8w | 0.88   | 2.41      | 3.254(2)  | 160           |

**Table S6.** Solvent mask values are calculated based on the unit cells for compounds **1** ~ **4** respectively.

| Compounds | V(Å <sup>3</sup> ) | e <sup>-</sup> | V/e <sup>-</sup> | V/at. | Content/Unit Cell   | e <sup>-</sup> |
|-----------|--------------------|----------------|------------------|-------|---------------------|----------------|
| <b>1</b>  | 2161               | 947            | 2.3              | 24.6  | 88H <sub>2</sub> O  | 880            |
| <b>2</b>  | 7371               | 4014           | 1.8              | 20.0  | 368H <sub>2</sub> O | 3680           |
| <b>3</b>  | 2224               | 951            | 2.3              | 25.3  | 88H <sub>2</sub> O  | 880            |
| <b>4</b>  | 1843               | 675            | 2.7              | 29.7  | 62H <sub>2</sub> O  | 620            |

**Table S7.** Selected bond distances ( Å ) and angles ( ° ) in  $[\text{Mo}_{12}\text{O}_{12}(\mu_2\text{-O})_4(\mu_3\text{-O})_{12}(\text{Htrz})_4(\text{trz})_4]\cdot 22\text{H}_2\text{O}$  (**1**) after solvent mask and final refinements.

| <b>1</b>    |           |               |           |
|-------------|-----------|---------------|-----------|
| Mo4–Mo3     | 2.5764(5) | Mo1–N2        | 2.187(5)  |
| Mo4–O18     | 1.983(3)  | Mo6–O26       | 2.118(3)  |
| Mo4–O25     | 2.098(3)  | Mo6–O19       | 1.977(4)  |
| Mo4–O14     | 1.921(4)  | Mo6–O27       | 2.187(4)  |
| Mo4–O28     | 2.210(4)  | Mo6–O15       | 1.928(4)  |
| Mo4–O4      | 1.686(4)  | Mo6–O6        | 1.698(4)  |
| Mo4–N6      | 2.199(4)  | Mo6–N20       | 2.194(5)  |
| Mo3–O18     | 1.969(3)  | Mo12–Mo11     | 2.6029(6) |
| Mo3–O17     | 2.292(3)  | Mo12–O26      | 2.068(3)  |
| Mo3–O22     | 1.983(3)  | Mo12–O28      | 1.989(4)  |
| Mo3–O14     | 1.966(4)  | Mo12–O27      | 1.992(4)  |
| Mo3–O3      | 1.694(4)  | Mo12–O12      | 1.690(4)  |
| Mo3–N11     | 2.200(5)  | Mo12–N24      | 2.159(5)  |
| Mo7–Mo8     | 2.5753(5) | Mo12–N21      | 2.208(5)  |
| Mo7–O26     | 1.984(3)  | Mo2–O21       | 2.100(4)  |
| Mo7–O18     | 2.304(3)  | Mo2–O17       | 1.974(3)  |
| Mo7–O20     | 1.967(3)  | Mo2–O13       | 1.924(4)  |
| Mo7–O16     | 1.951(4)  | Mo2–O23       | 2.190(4)  |
| Mo7–O7      | 1.672(4)  | Mo2–O2        | 1.691(4)  |
| Mo7–N23     | 2.181(4)  | Mo2–N9        | 2.210(5)  |
| Mo8–O22     | 2.110(4)  | Mo11–O25      | 2.070(3)  |
| Mo8–O20     | 1.975(3)  | Mo11–O28      | 1.986(4)  |
| Mo8–O16     | 1.925(4)  | Mo11–O27      | 1.977(4)  |
| Mo8–O24     | 2.199(4)  | Mo11–O11      | 1.695(4)  |
| Mo8–O8      | 1.692(4)  | Mo11–N5       | 2.199(5)  |
| Mo8–N17     | 2.191(5)  | Mo11–N3       | 2.159(5)  |
| Mo5–Mo6     | 2.5784(6) | Mo10–Mo9      | 2.5950(6) |
| Mo5–O21     | 2.006(3)  | Mo10–O22      | 2.077(3)  |
| Mo5–O20     | 2.291(3)  | Mo10–O23      | 1.985(4)  |
| Mo5–O19     | 1.961(4)  | Mo10–O24      | 1.979(4)  |
| Mo5–O15     | 1.958(4)  | Mo10–O10      | 1.692(4)  |
| Mo5–O5      | 1.687(4)  | Mo10–N12      | 2.162(5)  |
| Mo5–N15     | 2.174(5)  | Mo10–N18      | 2.201(5)  |
| Mo1–Mo2     | 2.5843(6) | Mo9–O21       | 2.053(3)  |
| Mo1–O25     | 1.997(3)  | Mo9–O23       | 1.981(4)  |
| Mo1–O17     | 1.965(4)  | Mo9–O24       | 1.976(4)  |
| Mo1–O19     | 2.263(4)  | Mo9–O9        | 1.701(4)  |
| Mo1–O13     | 1.969(4)  | Mo9–N14       | 2.161(5)  |
| Mo1–O1      | 1.687(5)  | Mo9–N8        | 2.207(5)  |
| O18–Mo4–Mo3 | 49.07(1)  | O12–Mo12–O27  | 112.14(2) |
| O18–Mo4–O25 | 87.93(1)  | O12–Mo12–N24  | 90.89(2)  |
| O18–Mo4–O28 | 94.55(1)  | O12–Mo12–N21  | 85.4(2)   |
| O18–Mo4–N6  | 163.53(2) | N24–Mo12–Mo11 | 132.33(1) |
| O25–Mo4–Mo3 | 101.06(9) | N24–Mo12–N21  | 95.22(2)  |



|             |           |               |           |
|-------------|-----------|---------------|-----------|
| O25–Mo4–O28 | 70.81(1)  | N21–Mo12–Mo11 | 130.79(1) |
| O25–Mo4–N6  | 75.60(2)  | O21–Mo2–Mo1   | 99.86(9)  |
| O14–Mo4–Mo3 | 49.23(1)  | O21–Mo2–O23   | 70.63(1)  |
| O14–Mo4–O18 | 97.04(2)  | O21–Mo2–N9    | 76.32(2)  |
| O14–Mo4–O25 | 94.76(2)  | O17–Mo2–Mo1   | 48.84(1)  |
| O14–Mo4–O28 | 161.15(2) | O17–Mo2–O21   | 87.65(1)  |
| O14–Mo4–N6  | 84.89(2)  | O17–Mo2–O23   | 94.62(1)  |
| O28–Mo4–Mo3 | 143.52(1) | O17–Mo2–N9    | 163.96(2) |
| O4–Mo4–Mo3  | 103.01(1) | O13–Mo2–Mo1   | 49.17(1)  |
| O4–Mo4–O18  | 103.90(2) | O13–Mo2–O21   | 93.21(2)  |
| O4–Mo4–O25  | 155.35(2) | O13–Mo2–O17   | 96.69(2)  |
| O4–Mo4–O14  | 104.93(2) | O13–Mo2–O23   | 159.86(2) |
| O4–Mo4–O28  | 86.55(2)  | O13–Mo2–N9    | 85.01(2)  |
| O4–Mo4–N6   | 91.30(2)  | O23–Mo2–Mo1   | 143.25(1) |
| N6–Mo4–Mo3  | 133.94(1) | O23–Mo2–N9    | 79.62(2)  |
| N6–Mo4–O28  | 79.87(2)  | O2–Mo2–Mo1    | 103.33(2) |
| O18–Mo3–Mo4 | 49.55(1)  | O2–Mo2–O21    | 156.39(2) |
| O18–Mo3–O17 | 84.37(1)  | O2–Mo2–O17    | 104.28(2) |
| O18–Mo3–O22 | 90.87(1)  | O2–Mo2–O13    | 105.27(2) |
| O18–Mo3–N11 | 165.11(2) | O2–Mo2–O23    | 87.92(2)  |
| O17–Mo3–Mo4 | 85.39(9)  | O2–Mo2–N9     | 90.5(2)   |
| O22–Mo3–Mo4 | 138.64(1) | N9–Mo2–Mo1    | 134.05(1) |
| O22–Mo3–O17 | 78.19(1)  | O25–Mo11–Mo12 | 98.09(1)  |
| O22–Mo3–N11 | 80.59(2)  | O25–Mo11–N5   | 75.72(2)  |
| O14–Mo3–Mo4 | 47.73(1)  | O25–Mo11–N3   | 80.17(2)  |
| O14–Mo3–O18 | 96.04(2)  | O28–Mo11–Mo12 | 49.13(1)  |
| O14–Mo3–O17 | 77.73(1)  | O28–Mo11–O25  | 75.97(1)  |
| O14–Mo3–O22 | 154.13(2) | O28–Mo11–N5   | 82.19(2)  |
| O14–Mo3–N11 | 86.82(2)  | O28–Mo11–N3   | 155.69(2) |
| O3–Mo3–Mo4  | 99.72(1)  | O27–Mo11–Mo12 | 49.27(1)  |
| O3–Mo3–O18  | 103.06(2) | O27–Mo11–O25  | 95.77(1)  |
| O3–Mo3–O17  | 172.56(2) | O27–Mo11–O28  | 95.09(2)  |
| O3–Mo3–O22  | 101.00(2) | O27–Mo11–N5   | 171.44(2) |
| O3–Mo3–O14  | 101.65(2) | O27–Mo11–N3   | 82.68(2)  |
| O3–Mo3–N11  | 90.60(2)  | O11–Mo11–Mo12 | 102.85(2) |
| N11–Mo3–Mo4 | 134.49(1) | O11–Mo11–O25  | 157.2(2)  |
| N11–Mo3–O17 | 81.96(2)  | O11–Mo11–O28  | 111.46(2) |
| O26–Mo7–Mo8 | 138.43(1) | O11–Mo11–O27  | 104.74(2) |
| O26–Mo7–O18 | 77.39(1)  | O11–Mo11–N5   | 83.8(2)   |
| O26–Mo7–N23 | 81.37(2)  | O11–Mo11–N3   | 92.4(2)   |
| O18–Mo7–Mo8 | 85.13(8)  | N5–Mo11–Mo12  | 130.23(1) |
| O20–Mo7–Mo8 | 49.35(1)  | N3–Mo11–Mo12  | 131.73(1) |
| O20–Mo7–O26 | 90.84(1)  | N3–Mo11–N5    | 96.45(2)  |
| O20–Mo7–O18 | 82.96(1)  | O22–Mo10–Mo9  | 97.51(1)  |
| O20–Mo7–N23 | 163.80(2) | O22–Mo10–N12  | 80.07(2)  |
| O16–Mo7–Mo8 | 47.92(1)  | O22–Mo10–N18  | 75.54(2)  |
| O16–Mo7–O26 | 153.50(2) | O23–Mo10–Mo9  | 49.08(1)  |
| O16–Mo7–O18 | 78.04(1)  | O23–Mo10–O22  | 94.18(2)  |
| O16–Mo7–O20 | 95.88(2)  | O23–Mo10–N12  | 84.31(2)  |
| O16–Mo7–N23 | 85.33(2)  | O23–Mo10–N18  | 169.71(2) |

|             |           |              |           |
|-------------|-----------|--------------|-----------|
| O7–Mo7–Mo8  | 100.30(2) | O24–Mo10–Mo9 | 48.94(1)  |
| O7–Mo7–O26  | 100.61(2) | O24–Mo10–O22 | 75.82(1)  |
| O7–Mo7–O18  | 173.32(2) | O24–Mo10–O23 | 94.37(2)  |
| O7–Mo7–O20  | 103.51(2) | O24–Mo10–N12 | 155.70(2) |
| O7–Mo7–O16  | 102.65(2) | O24–Mo10–N18 | 83.18(2)  |
| O7–Mo7–N23  | 91.92(2)  | O10–Mo10–Mo9 | 102.44(2) |
| N23–Mo7–Mo8 | 133.15(1) | O10–Mo10–O22 | 158.54(2) |
| N23–Mo7–O18 | 81.49(2)  | O10–Mo10–O23 | 104.81(2) |
| O22–Mo8–Mo7 | 101.10(9) | O10–Mo10–O24 | 111.90(2) |
| O22–Mo8–O24 | 70.67(1)  | O10–Mo10–N12 | 91.8(2)   |
| O22–Mo8–N17 | 74.78(2)  | O10–Mo10–N18 | 85.3(2)   |
| O20–Mo8–Mo7 | 49.08(1)  | N12–Mo10–Mo9 | 133.23(1) |
| O20–Mo8–O22 | 86.93(2)  | N12–Mo10–N18 | 93.80(2)  |
| O20–Mo8–O24 | 94.35(1)  | N18–Mo10–Mo9 | 131.20(1) |
| O20–Mo8–N17 | 161.70(2) | O21–Mo9–Mo10 | 99.02(1)  |
| O16–Mo8–Mo7 | 48.81(1)  | O21–Mo9–N14  | 80.62(2)  |
| O16–Mo8–O22 | 95.18(2)  | O21–Mo9–N8   | 75.93(2)  |
| O16–Mo8–O20 | 96.48(2)  | O23–Mo9–Mo10 | 49.19(1)  |
| O16–Mo8–O24 | 161.68(2) | O23–Mo9–O21  | 75.88(2)  |
| O16–Mo8–N17 | 84.67(2)  | O23–Mo9–N14  | 155.80(2) |
| O24–Mo8–Mo7 | 143.38(1) | O23–Mo9–N8   | 82.43(2)  |
| O8–Mo8–Mo7  | 102.79(1) | O24–Mo9–Mo10 | 49.05(1)  |
| O8–Mo8–O22  | 155.37(2) | O24–Mo9–O21  | 96.18(1)  |
| O8–Mo8–O20  | 104.33(2) | O24–Mo9–O23  | 94.58(2)  |
| O8–Mo8–O16  | 105.00(2) | O24–Mo9–N14  | 82.17(2)  |
| O8–Mo8–O24  | 86.48(2)  | O24–Mo9–N8   | 172.02(2) |
| O8–Mo8–N17  | 92.9(2)   | O9–Mo9–Mo10  | 101.32(2) |
| N17–Mo8–Mo7 | 133.20(1) | O9–Mo9–O21   | 157.60(2) |
| N17–Mo8–O24 | 80.45(2)  | O9–Mo9–O23   | 111.08(2) |
| O21–Mo5–Mo6 | 138.95(1) | O9–Mo9–O24   | 104.20(2) |
| O21–Mo5–O20 | 77.86(1)  | O9–Mo9–N14   | 92.90(2)  |
| O21–Mo5–N15 | 81.12(2)  | O9–Mo9–N8    | 83.8(2)   |
| O20–Mo5–Mo6 | 86.25(9)  | N14–Mo9–Mo10 | 131.09(1) |
| O19–Mo5–Mo6 | 49.36(1)  | N14–Mo9–N8   | 97.51(2)  |
| O19–Mo5–O21 | 90.98(1)  | N8–Mo9–Mo10  | 130.19(1) |
| O19–Mo5–O20 | 83.44(1)  | Mo7–O26–Mo6  | 124.61(2) |
| O19–Mo5–N15 | 161.84(2) | Mo7–O26–Mo12 | 131.49(2) |
| O15–Mo5–Mo6 | 47.93(1)  | Mo12–O26–Mo6 | 103.32(2) |
| O15–Mo5–O21 | 154.92(2) | Mo4–O18–Mo7  | 145.21(2) |
| O15–Mo5–O20 | 79.01(1)  | Mo3–O18–Mo4  | 81.39(1)  |
| O15–Mo5–O19 | 95.90(2)  | Mo3–O18–Mo7  | 133.27(2) |
| O15–Mo5–N15 | 85.07(2)  | Mo5–O21–Mo2  | 124.52(2) |
| O5–Mo5–Mo6  | 99.65(1)  | Mo5–O21–Mo9  | 131.36(2) |
| O5–Mo5–O21  | 99.86(2)  | Mo9–O21–Mo2  | 103.91(2) |
| O5–Mo5–O20  | 172.87(2) | Mo1–O25–Mo4  | 124.02(2) |
| O5–Mo5–O19  | 103.42(2) | Mo1–O25–Mo11 | 131.66(2) |
| O5–Mo5–O15  | 101.92(2) | Mo11–O25–Mo4 | 103.96(2) |
| O5–Mo5–N15  | 94.08(2)  | Mo1–O17–Mo3  | 133.19(2) |
| N15–Mo5–Mo6 | 132.74(1) | Mo1–O17–Mo2  | 82.00(1)  |
| N15–Mo5–O20 | 78.93(2)  | Mo2–O17–Mo3  | 144.56(2) |

|               |           |               |           |
|---------------|-----------|---------------|-----------|
| O25–Mo1–Mo2   | 138.61(1) | Mo3–O22–Mo8   | 124.36(2) |
| O25–Mo1–O19   | 77.56(1)  | Mo3–O22–Mo10  | 132.02(2) |
| O25–Mo1–N2    | 81.02(2)  | Mo10–O22–Mo8  | 103.24(2) |
| O17–Mo1–Mo2   | 49.16(1)  | Mo7–O20–Mo8   | 81.57(1)  |
| O17–Mo1–O25   | 90.95(1)  | Mo7–O20–Mo5   | 132.28(2) |
| O17–Mo1–O19   | 84.27(1)  | Mo8–O20–Mo5   | 145.61(2) |
| O17–Mo1–O13   | 95.52(2)  | Mo5–O19–Mo1   | 132.77(2) |
| O17–Mo1–N2    | 162.91(2) | Mo5–O19–Mo6   | 81.81(1)  |
| O19–Mo1–Mo2   | 86.58(9)  | Mo6–O19–Mo1   | 144.86(2) |
| O13–Mo1–Mo2   | 47.65(1)  | Mo2–O13–Mo1   | 83.18(1)  |
| O13–Mo1–O25   | 155.01(2) | Mo4–O14–Mo3   | 83.04(2)  |
| O13–Mo1–O19   | 79.11(2)  | Mo12–O28–Mo4  | 133.79(2) |
| O13–Mo1–N2    | 85.99(2)  | Mo11–O28–Mo4  | 102.84(2) |
| O1–Mo1–Mo2    | 100.35(2) | Mo11–O28–Mo12 | 81.81(1)  |
| O1–Mo1–O25    | 99.87(2)  | Mo12–O27–Mo6  | 103.48(2) |
| O1–Mo1–O17    | 103.90(2) | Mo11–O27–Mo6  | 132.96(2) |
| O1–Mo1–O19    | 171.55(2) | Mo11–O27–Mo12 | 81.95(1)  |
| O1–Mo1–O13    | 101.93(2) | Mo8–O16–Mo7   | 83.27(2)  |
| O1–Mo1–N2     | 92.4(2)   | Mo10–O23–Mo2  | 135.32(2) |
| N2–Mo1–Mo2    | 133.44(1) | Mo9–O23–Mo2   | 103.16(2) |
| N2–Mo1–O19    | 79.29(2)  | Mo9–O23–Mo10  | 81.74(2)  |
| O26–Mo6–Mo5   | 99.86(9)  | Mo6–O15–Mo5   | 83.14(2)  |
| O26–Mo6–O27   | 70.94(1)  | Mo10–O24–Mo8  | 103.44(2) |
| O26–Mo6–N20   | 76.12(2)  | Mo9–O24–Mo8   | 133.92(2) |
| O19–Mo6–Mo5   | 48.83(1)  | Mo9–O24–Mo10  | 82.01(2)  |
| O19–Mo6–O26   | 86.71(1)  | N12–N11–Mo3   | 122.1(4)  |
| O19–Mo6–O27   | 95.83(1)  | N10–N11–Mo3   | 127.0(4)  |
| O19–Mo6–N20   | 162.83(2) | N14–N15–Mo5   | 121.9(4)  |
| O27–Mo6–Mo5   | 144.53(1) | C9–N15–Mo5    | 130.5(4)  |
| O27–Mo6–N20   | 78.93(2)  | N5–N6–Mo4     | 116.1(3)  |
| O15–Mo6–Mo5   | 48.93(1)  | C3–N6–Mo4     | 134.9(4)  |
| O15–Mo6–O26   | 93.79(2)  | N21–N20–Mo6   | 117.3(4)  |
| O15–Mo6–O19   | 96.35(2)  | N19–N20–Mo6   | 131.8(4)  |
| O15–Mo6–O27   | 159.84(2) | N6–N5–Mo11    | 116.7(3)  |
| O15–Mo6–N20   | 84.75(2)  | N4–N5–Mo11    | 132.0(4)  |
| O6–Mo6–Mo5    | 101.51(1) | N24–N23–Mo7   | 122.6(3)  |
| O6–Mo6–O26    | 158.08(2) | N22–N23–Mo7   | 127.0(4)  |
| O6–Mo6–O19    | 103.81(2) | N15–N14–Mo9   | 121.7(3)  |
| O6–Mo6–O27    | 88.68(2)  | N13–N14–Mo9   | 124.9(4)  |
| O6–Mo6–O15    | 103.89(2) | N23–N24–Mo12  | 121.8(3)  |
| O6–Mo6–N20    | 92.5(2)   | C15–N24–Mo12  | 129.4(4)  |
| N20–Mo6–Mo5   | 133.49(1) | N20–N21–Mo12  | 114.9(3)  |
| O26–Mo12–Mo11 | 97.28(1)  | C13–N21–Mo12  | 137.4(5)  |
| O26–Mo12–N24  | 80.95(2)  | N2–N3–Mo11    | 122.3(3)  |
| O26–Mo12–N21  | 75.56(2)  | C1–N3–Mo11    | 125.8(4)  |
| O28–Mo12–Mo11 | 49.06(1)  | N3–N2–Mo1     | 121.3(3)  |
| O28–Mo12–O26  | 94.82(1)  | N1–N2–Mo1     | 128.6(5)  |
| O28–Mo12–O27  | 94.55(2)  | N11–N12–Mo10  | 121.9(3)  |
| O28–Mo12–N24  | 83.43(2)  | C7–N12–Mo10   | 128.7(4)  |
| O28–Mo12–N21  | 170.38(2) | N8–N9–Mo2     | 115.7(4)  |

---

|               |           |              |          |
|---------------|-----------|--------------|----------|
| O27–Mo12–Mo11 | 48.78(1)  | C5–N9–Mo2    | 134.4(5) |
| O27–Mo12–O26  | 75.93(1)  | N9–N8–Mo9    | 116.4(3) |
| O27–Mo12–N24  | 156.56(2) | N7–N8–Mo9    | 134.5(5) |
| O27–Mo12–N21  | 82.87(2)  | N18–N17–Mo8  | 117.3(4) |
| O12–Mo12–Mo11 | 102.90(2) | N16–N17–Mo8  | 132.9(4) |
| O12–Mo12–O26  | 158.42(2) | N17–N18–Mo10 | 115.7(3) |
| O12–Mo12–O28  | 104.11(2) | C11–N18–Mo10 | 135.3(5) |

---

**Table S8.** Selected bond distances ( Å ) and angles ( ° ) in [Mo<sub>12</sub>O<sub>12</sub>(μ<sub>2</sub>-O)<sub>4</sub>(μ<sub>3</sub>-O)<sub>12</sub>(Htrz)<sub>4</sub>(trz)<sub>4</sub>] $\cdot$ 92H<sub>2</sub>O (**2**) after solvent mask and final refinements.

| <b>2</b>                             |           |                                       |           |
|--------------------------------------|-----------|---------------------------------------|-----------|
| Mo2–Mo1                              | 2.5718(6) | Mo1–O2                                | 1.927(4)  |
| Mo2–O3                               | 1.965(4)  | Mo1–O1                                | 1.692(4)  |
| Mo2–O3 <sup>1</sup>                  | 2.291(4)  | Mo1–N4 <sup>1</sup>                   | 2.215(5)  |
| Mo2–O5                               | 1.996(3)  | Mo3–Mo3 <sup>3</sup>                  | 2.5972(9) |
| Mo2–O2                               | 1.959(4)  | Mo3–O5                                | 2.062(4)  |
| Mo2–O4                               | 1.689(4)  | Mo3–O6 <sup>3</sup>                   | 1.987(4)  |
| Mo2–N1                               | 2.172(5)  | Mo3–O6                                | 1.977(4)  |
| Mo1–O3                               | 1.963(4)  | Mo3–O7                                | 1.692(4)  |
| Mo1–O5 <sup>1</sup>                  | 2.101(4)  | Mo3–N2                                | 2.158(5)  |
| Mo1–O6 <sup>2</sup>                  | 2.181(4)  | Mo3–N5                                | 2.211(5)  |
| O3–Mo2–Mo1                           | 49.07(1)  | N4 <sup>1</sup> –Mo1–Mo2              | 134.34(1) |
| O3 <sup>1</sup> –Mo2–Mo1             | 86.75(9)  | O5–Mo3–Mo3 <sup>3</sup>               | 98.58(1)  |
| O3–Mo2–O3 <sup>1</sup>               | 83.98(2)  | O5–Mo3–N2                             | 80.62(2)  |
| O3–Mo2–O5                            | 91.48(2)  | O5–Mo3–N5                             | 75.99(2)  |
| O3–Mo2–N1                            | 163.61(2) | O6 <sup>3</sup> –Mo3–Mo3 <sup>3</sup> | 48.91(1)  |
| O5–Mo2–Mo1                           | 139.28(1) | O6–Mo3–Mo3 <sup>3</sup>               | 49.23(1)  |
| O5–Mo2–O3 <sup>1</sup>               | 78.16(1)  | O6–Mo3–O5                             | 95.37(2)  |
| O5–Mo2–N1                            | 81.30(2)  | O6 <sup>3</sup> –Mo3–O5               | 75.59(2)  |
| O2–Mo2–Mo1                           | 48.03(1)  | O6–Mo3–O6 <sup>3</sup>                | 94.28(2)  |
| O2–Mo2–O3                            | 95.73(2)  | O6 <sup>3</sup> –Mo3–N2               | 155.67(2) |
| O2–Mo2–O3 <sup>1</sup>               | 79.24(1)  | O6–Mo3–N2                             | 82.85(2)  |
| O2–Mo2–O5                            | 155.39(2) | O6–Mo3–N5                             | 171.28(2) |
| O2–Mo2–N1                            | 85.38(2)  | O6 <sup>3</sup> –Mo3–N5               | 82.50(2)  |
| O4–Mo2–Mo1                           | 98.62(1)  | O7–Mo3–Mo3 <sup>3</sup>               | 101.90(2) |
| O4–Mo2–O3                            | 102.49(2) | O7–Mo3–O5                             | 157.77(2) |
| O4–Mo2–O3 <sup>1</sup>               | 173.35(2) | O7–Mo3–O6                             | 104.5(2)  |
| O4–Mo2–O5                            | 99.94(2)  | O7–Mo3–O6 <sup>3</sup>                | 112.1(2)  |
| O4–Mo2–O2                            | 101.40(2) | O7–Mo3–N2                             | 91.9(2)   |
| O4–Mo2–N1                            | 93.28(2)  | O7–Mo3–N5                             | 84.2(2)   |
| N1–Mo2–Mo1                           | 133.28(1) | N2–Mo3–Mo3 <sup>3</sup>               | 131.98(1) |
| N1–Mo2–O3 <sup>1</sup>               | 80.16(2)  | N2–Mo3–N5                             | 96.72(2)  |
| O3–Mo1–Mo2                           | 49.12(1)  | N5–Mo3–Mo3 <sup>3</sup>               | 130.02(1) |
| O3–Mo1–O5 <sup>1</sup>               | 87.22(1)  | Mo2–O3–Mo2 <sup>2</sup>               | 131.79(2) |
| O3–Mo1–O6 <sup>2</sup>               | 93.62(2)  | Mo1–O3–Mo2 <sup>2</sup>               | 145.97(2) |
| O3–Mo1–N4 <sup>1</sup>               | 163.45(2) | Mo1–O3–Mo2                            | 81.81(1)  |
| O5 <sup>1</sup> –Mo1–Mo2             | 100.18(1) | Mo2–O5–Mo1 <sup>2</sup>               | 124.88(2) |
| O5 <sup>1</sup> –Mo1–O6 <sup>2</sup> | 70.82(1)  | Mo2–O5–Mo3                            | 131.36(2) |
| O5 <sup>1</sup> –Mo1–N4 <sup>1</sup> | 76.27(2)  | Mo3–O5–Mo1 <sup>2</sup>               | 103.62(2) |
| O6 <sup>2</sup> –Mo1–Mo2             | 142.62(1) | Mo3 <sup>3</sup> –O6–Mo1 <sup>1</sup> | 103.36(2) |
| O6 <sup>2</sup> –Mo1–N4 <sup>1</sup> | 80.16(2)  | Mo3–O6–Mo1 <sup>1</sup>               | 135.4(2)  |
| O2–Mo1–Mo2                           | 49.11(1)  | Mo3–O6–Mo3 <sup>3</sup>               | 81.86(15) |
| O2–Mo1–O3                            | 96.84(2)  | Mo1–O2–Mo2                            | 82.86(15) |
| O2–Mo1–O5 <sup>1</sup>               | 93.68(2)  | N2–N1–Mo2                             | 122.0(3)  |
| O2–Mo1–O6 <sup>2</sup>               | 160.86(2) | C2–N1–Mo2                             | 130.1(4)  |

|                        |           |                        |          |
|------------------------|-----------|------------------------|----------|
| O2–Mo1–N4 <sup>1</sup> | 85.37(2)  | N1–N2–Mo3              | 121.4(3) |
| O1–Mo1–Mo2             | 102.62(2) | N3–N2–Mo3              | 127.5(4) |
| O1–Mo1–O3              | 104.56(2) | N5–N4–Mo1 <sup>2</sup> | 115.5(3) |
| O1–Mo1–O5 <sup>1</sup> | 156.81(2) | C4–N4–Mo1 <sup>2</sup> | 136.0(5) |
| O1–Mo1–O6 <sup>2</sup> | 88.29(2)  | N4–N5–Mo3              | 116.5(3) |
| O1–Mo1–O2              | 104.42(2) | N6–N5–Mo3              | 131.4(5) |
| O1–Mo1–N4 <sup>1</sup> | 90.7(2)   |                        |          |

Symmetric codes: <sup>1</sup>  $-1/4 + y, 5/4 - x, 5/4 - z$ ; <sup>2</sup>  $5/4 - y, 1/4 + x, 5/4 - z$ ;  $1 - x, 3/2 - y, +z$ .

**Table S9.** Selected bond distances ( Å ) and angles ( ° ) in  $[\text{Mo}_8\text{O}_8(\mu_2\text{-O})_{12}(\text{Htrz})_8]_{1/2}[\text{Mo}_{12}\text{O}_{12}(\mu_2\text{-O})_4(\mu_3\text{-O})_{12}(\text{Htrz})_4(\text{trz})_4]\cdot 44\text{H}_2\text{O}$  (**3**) after solvent mask and final refinements.

| <b>3</b>  |           |                      |           |
|-----------|-----------|----------------------|-----------|
| Mo5–Mo6   | 2.5801(7) | Mo9–N27              | 2.184(6)  |
| Mo5–O34   | 1.998(4)  | Mo12–O30             | 1.961(5)  |
| Mo5–O30   | 2.323(5)  | Mo12–O29             | 2.281(5)  |
| Mo5–O27   | 1.953(5)  | Mo12–O31             | 1.990(5)  |
| Mo5–O23   | 1.948(5)  | Mo12–O26             | 1.961(5)  |
| Mo5–O11   | 1.687(5)  | Mo12–O18             | 1.679(6)  |
| Mo5–N14   | 2.179(6)  | Mo12–N35             | 2.192(7)  |
| Mo16–Mo15 | 2.5937(8) | Mo13–Mo14            | 2.5964(1) |
| Mo16–O34  | 2.057(4)  | Mo13–O32             | 1.973(5)  |
| Mo16–O35  | 1.983(5)  | Mo13–O31             | 2.064(5)  |
| Mo16–O36  | 1.967(5)  | Mo13–O38             | 1.969(6)  |
| Mo16–O22  | 1.685(5)  | Mo13–O19             | 1.694(6)  |
| Mo16–N20  | 2.213(6)  | Mo13–N16             | 2.219(9)  |
| Mo16–N13  | 2.160(6)  | Mo13–N36             | 2.165(7)  |
| Mo7–Mo8   | 2.5728(7) | Mo14–O33             | 2.067(5)  |
| Mo7–O28   | 1.969(5)  | Mo14–O32             | 1.960(6)  |
| Mo7–O34   | 2.125(5)  | Mo14–O38             | 1.980(6)  |
| Mo7–O35   | 2.194(4)  | Mo14–O20             | 1.688(6)  |
| Mo7–O24   | 1.925(5)  | Mo14–N22             | 2.152(7)  |
| Mo7–O13   | 1.677(5)  | Mo14–N29             | 2.178(8)  |
| Mo7–N19   | 2.206(6)  | Mo10–O33             | 2.107(5)  |
| Mo15–O35  | 1.962(5)  | Mo10–O29             | 1.976(5)  |
| Mo15–O36  | 1.975(5)  | Mo10–O38             | 2.192(6)  |
| Mo15–O37  | 2.060(5)  | Mo10–O25             | 1.918(6)  |
| Mo15–O21  | 1.686(5)  | Mo10–O16             | 1.685(6)  |
| Mo15–N32  | 2.204(6)  | Mo10–N30             | 2.212(7)  |
| Mo15–N26  | 2.159(6)  | Mo3–Mo4              | 2.5424(1) |
| Mo6–O27   | 1.970(5)  | Mo3–O7               | 2.153(6)  |
| Mo6–O23   | 1.914(5)  | Mo3–O9               | 1.942(8)  |
| Mo6–O32   | 2.206(5)  | Mo3–O8               | 1.925(6)  |
| Mo6–O31   | 2.122(5)  | Mo3–O3               | 1.711(7)  |
| Mo6–O12   | 1.687(5)  | Mo3–N7               | 2.213(7)  |
| Mo6–N17   | 2.212(6)  | Mo3–N4               | 2.203(1)  |
| Mo8–O28   | 1.960(5)  | Mo4–O10              | 2.168(6)  |
| Mo8–O24   | 1.961(5)  | Mo4–O9               | 1.947(6)  |
| Mo8–O27   | 2.301(5)  | Mo4–O8               | 1.920(8)  |
| Mo8–O33   | 1.997(5)  | Mo4–N11              | 2.202(7)  |
| Mo8–O14   | 1.689(5)  | Mo4–N1 <sup>1</sup>  | 2.183(9)  |
| Mo8–N23   | 2.170(6)  | Mo4–O4               | 1.698(6)  |
| Mo11–Mo12 | 2.5776(8) | Mo1–Mo2              | 2.5533(1) |
| Mo11–O36  | 2.191(5)  | Mo1–O10 <sup>1</sup> | 2.161(6)  |
| Mo11–O30  | 1.962(5)  | Mo1–O6               | 1.938(6)  |
| Mo11–O37  | 2.120(5)  | Mo1–O5               | 1.934(8)  |
| Mo11–O26  | 1.922(5)  | Mo1–O1               | 1.679(7)  |
| Mo11–O17  | 1.694(6)  | Mo1–N2               | 2.207(9)  |

|               |           |                      |           |
|---------------|-----------|----------------------|-----------|
| Mo11–N33      | 2.202(7)  | Mo1–N10 <sup>1</sup> | 2.208(9)  |
| Mo9–Mo10      | 2.5776(8) | Mo2–O6               | 1.940(7)  |
| Mo9–O28       | 2.309(5)  | Mo2–O7               | 2.153(6)  |
| Mo9–O37       | 1.996(5)  | Mo2–O5               | 1.923(7)  |
| Mo9–O29       | 1.962(5)  | Mo2–O2               | 1.683(7)  |
| Mo9–O25       | 1.957(6)  | Mo2–N8               | 2.220(7)  |
| Mo9–O15       | 1.673(6)  | Mo2–N5               | 2.205(1)  |
| O34–Mo5–Mo6   | 138.65(1) | O32–Mo14–O38         | 94.5(2)   |
| O34–Mo5–O30   | 78.03(2)  | O32–Mo14–N22         | 82.9(2)   |
| O34–Mo5–N14   | 81.2(2)   | O32–Mo14–N29         | 170.4(2)  |
| O30–Mo5–Mo6   | 86.01(1)  | O38–Mo14–Mo13        | 48.70(2)  |
| O27–Mo5–Mo6   | 49.17(1)  | O38–Mo14–O33         | 75.6(2)   |
| O27–Mo5–O34   | 90.99(2)  | O38–Mo14–N22         | 156.4(2)  |
| O27–Mo5–O30   | 83.98(2)  | O38–Mo14–N29         | 83.5(3)   |
| O27–Mo5–N14   | 164.2(2)  | O20–Mo14–Mo13        | 102.5(2)  |
| O23–Mo5–Mo6   | 47.52(2)  | O20–Mo14–O33         | 157.9(3)  |
| O23–Mo5–O34   | 153.98(2) | O20–Mo14–O32         | 105.1(3)  |
| O23–Mo5–O30   | 77.51(2)  | O20–Mo14–O38         | 110.2(3)  |
| O23–Mo5–O27   | 95.2(2)   | O20–Mo14–N22         | 93.0(3)   |
| O23–Mo5–N14   | 86.4(2)   | O20–Mo14–N29         | 84.4(3)   |
| O11–Mo5–Mo6   | 99.15(2)  | N22–Mo14–Mo13        | 131.59(2) |
| O11–Mo5–O34   | 101.1(2)  | N22–Mo14–N29         | 95.2(3)   |
| O11–Mo5–O30   | 172.6(2)  | N29–Mo14–Mo13        | 131.5(2)  |
| O11–Mo5–O27   | 103.4(2)  | O33–Mo10–Mo9         | 100.16(1) |
| O11–Mo5–O23   | 102.0(2)  | O33–Mo10–O38         | 70.44(2)  |
| O11–Mo5–N14   | 91.6(2)   | O33–Mo10–N30         | 75.3(2)   |
| N14–Mo5–Mo6   | 133.84(2) | O29–Mo10–Mo9         | 48.88(2)  |
| N14–Mo5–O30   | 80.9(2)   | O29–Mo10–O33         | 86.7(2)   |
| O34–Mo16–Mo15 | 98.93(1)  | O29–Mo10–O38         | 94.6(2)   |
| O34–Mo16–N20  | 75.89(2)  | O29–Mo10–N30         | 162.0(2)  |
| O34–Mo16–N13  | 80.6(2)   | O38–Mo10–Mo9         | 143.34(2) |
| O35–Mo16–Mo15 | 48.53(1)  | O38–Mo10–N30         | 79.9(3)   |
| O35–Mo16–O34  | 76.45(2)  | O25–Mo10–Mo9         | 48.95(2)  |
| O35–Mo16–N20  | 82.4(2)   | O25–Mo10–O33         | 94.2(2)   |
| O35–Mo16–N13  | 156.5(2)  | O25–Mo10–O29         | 96.4(2)   |
| O36–Mo16–Mo15 | 48.99(1)  | O25–Mo10–O38         | 160.6(2)  |
| O36–Mo16–O34  | 96.31(2)  | O25–Mo10–N30         | 84.8(3)   |
| O36–Mo16–O35  | 94.10(2)  | O16–Mo10–Mo9         | 103.1(2)  |
| O36–Mo16–N20  | 172.0(2)  | O16–Mo10–O33         | 156.2(2)  |
| O36–Mo16–N13  | 83.4(2)   | O16–Mo10–O29         | 104.7(3)  |
| O22–Mo16–Mo15 | 102.2(2)  | O16–Mo10–O38         | 87.6(3)   |
| O22–Mo16–O34  | 157.1(2)  | O16–Mo10–O25         | 104.9(3)  |
| O22–Mo16–O35  | 111.7(2)  | O16–Mo10–N30         | 92.2(3)   |
| O22–Mo16–O36  | 104.1(2)  | N30–Mo10–Mo9         | 133.5(2)  |
| O22–Mo16–N20  | 83.9(2)   | O7–Mo3–Mo4           | 106.00(2) |
| O22–Mo16–N13  | 91.5(3)   | O7–Mo3–N7            | 74.7(2)   |
| N20–Mo16–Mo15 | 129.62(2) | O7–Mo3–N4            | 75.3(3)   |
| N13–Mo16–Mo15 | 132.21(2) | O9–Mo3–Mo4           | 49.27(2)  |
| N13–Mo16–N20  | 97.0(2)   | O9–Mo3–O7            | 89.0(3)   |



|               |           |                                        |           |
|---------------|-----------|----------------------------------------|-----------|
| O28–Mo7–Mo8   | 48.94(1)  | O9–Mo3–N7                              | 86.8(3)   |
| O28–Mo7–O34   | 87.03(2)  | O9–Mo3–N4                              | 164.3(3)  |
| O28–Mo7–O35   | 94.03(2)  | O8–Mo3–Mo4                             | 48.5(2)   |
| O28–Mo7–N19   | 163.8(2)  | O8–Mo3–O7                              | 90.9(3)   |
| O34–Mo7–Mo8   | 99.49(1)  | O8–Mo3–O9                              | 93.6(3)   |
| O34–Mo7–O35   | 70.72(2)  | O8–Mo3–N7                              | 165.5(3)  |
| O34–Mo7–N19   | 76.84(2)  | O8–Mo3–N4                              | 86.5(3)   |
| O35–Mo7–Mo8   | 142.77(1) | O3–Mo3–Mo4                             | 99.1(3)   |
| O35–Mo7–N19   | 79.90(2)  | O3–Mo3–O7                              | 154.9(3)  |
| O24–Mo7–Mo8   | 49.13(1)  | O3–Mo3–O9                              | 107.0(4)  |
| O24–Mo7–O28   | 96.5(2)   | O3–Mo3–O8                              | 106.9(3)  |
| O24–Mo7–O34   | 92.25(2)  | O3–Mo3–N7                              | 86.7(3)   |
| O24–Mo7–O35   | 159.48(2) | O3–Mo3–N4                              | 87.9(4)   |
| O24–Mo7–N19   | 85.2(2)   | N7–Mo3–Mo4                             | 135.6(2)  |
| O13–Mo7–Mo8   | 102.13(2) | N4–Mo3–Mo4                             | 134.7(2)  |
| O13–Mo7–O28   | 103.4(2)  | N4–Mo3–N7                              | 89.2(3)   |
| O13–Mo7–O34   | 157.8(2)  | O10–Mo4–Mo3                            | 106.42(2) |
| O13–Mo7–O35   | 88.8(2)   | O10–Mo4–N11                            | 74.8(3)   |
| O13–Mo7–O24   | 105.7(2)  | O10–Mo4–N1 <sup>1</sup>                | 75.3(3)   |
| O13–Mo7–N19   | 91.5(2)   | O9–Mo4–Mo3                             | 49.1(2)   |
| N19–Mo7–Mo8   | 134.26(1) | O9–Mo4–O10                             | 91.6(2)   |
| O35–Mo15–Mo16 | 49.26(1)  | O9–Mo4–N11                             | 166.4(3)  |
| O35–Mo15–O36  | 94.55(2)  | O9–Mo4–N1 <sup>1</sup>                 | 85.3(3)   |
| O35–Mo15–O37  | 96.13(2)  | O8–Mo4–Mo3                             | 48.69(2)  |
| O35–Mo15–N32  | 172.3(2)  | O8–Mo4–O10                             | 88.8(3)   |
| O35–Mo15–N26  | 84.2(2)   | O8–Mo4–O9                              | 93.6(3)   |
| O36–Mo15–Mo16 | 48.74(1)  | O8–Mo4–N11                             | 87.5(3)   |
| O36–Mo15–O37  | 76.46(2)  | O8–Mo4–N1 <sup>1</sup>                 | 164.0(3)  |
| O36–Mo15–N32  | 82.3(2)   | N1 <sup>1</sup> –Mo4–Mo3               | 135.6(2)  |
| O36–Mo15–N26  | 156.7(2)  | N1 <sup>1</sup> –Mo4–Mo3               | 134.1(2)  |
| O37–Mo15–Mo16 | 98.90(1)  | N1 <sup>1</sup> –Mo4–N11               | 89.8(3)   |
| O37–Mo15–N32  | 76.3(2)   | O4–Mo4–Mo3                             | 98.8(3)   |
| O37–Mo15–N26  | 80.6(2)   | O4–Mo4–O10                             | 154.8(3)  |
| O21–Mo15–Mo16 | 101.65(2) | O4–Mo4–O9                              | 106.1(3)  |
| O21–Mo15–O35  | 103.7(2)  | O4–Mo4–O8                              | 107.3(4)  |
| O21–Mo15–O36  | 111.4(2)  | O4–Mo4–N11                             | 86.4(3)   |
| O21–Mo15–O37  | 157.8(2)  | O4–Mo4–N1 <sup>1</sup>                 | 88.2(4)   |
| O21–Mo15–N32  | 84.0(2)   | O10 <sup>1</sup> –Mo1–Mo2              | 105.02(2) |
| O21–Mo15–N26  | 91.4(3)   | O10 <sup>1</sup> –Mo1–N2               | 75.0(3)   |
| N32–Mo15–Mo16 | 129.62(2) | O10 <sup>1</sup> –Mo1–N10 <sup>1</sup> | 74.9(2)   |
| N26–Mo15–Mo16 | 133.33(2) | O6–Mo1–Mo2                             | 48.9(2)   |
| N26–Mo15–N32  | 95.9(2)   | O6–Mo1–O10 <sup>1</sup>                | 88.7(2)   |
| O27–Mo6–Mo5   | 48.60(1)  | O6–Mo1–N2                              | 163.6(3)  |
| O27–Mo6–O32   | 95.00(2)  | O6–Mo1–N10 <sup>1</sup>                | 87.3(3)   |
| O27–Mo6–O31   | 87.24(2)  | O5–Mo1–Mo2                             | 48.4(2)   |
| O27–Mo6–N17   | 163.1(2)  | O5–Mo1–O10 <sup>1</sup>                | 90.4(3)   |
| O23–Mo6–Mo5   | 48.65(1)  | O5–Mo1–O6                              | 93.3(3)   |
| O23–Mo6–O27   | 95.7(2)   | O5–Mo1–N2                              | 84.7(3)   |
| O23–Mo6–O32   | 160.1(2)  | O5–Mo1–N10 <sup>1</sup>                | 165.3(3)  |
| O23–Mo6–O31   | 93.4(2)   | O1–Mo1–Mo2                             | 98.7(3)   |

|               |           |                           |           |
|---------------|-----------|---------------------------|-----------|
| O23–Mo6–N17   | 86.1(2)   | O1–Mo1–O10 <sup>1</sup>   | 156.3(3)  |
| O32–Mo6–Mo5   | 143.46(1) | O1–Mo1–O6                 | 106.3(3)  |
| O32–Mo6–N17   | 78.9(2)   | O1–Mo1–O5                 | 106.5(4)  |
| O31–Mo6–Mo5   | 100.42(1) | O1–Mo1–N2                 | 89.8(3)   |
| O31–Mo6–O32   | 70.38(2)  | O1–Mo1–N10 <sup>1</sup>   | 87.3(4)   |
| O31–Mo6–N17   | 75.9(2)   | N2–Mo1–Mo2                | 132.9(2)  |
| O12–Mo6–Mo5   | 102.92(2) | N2–Mo1–N10 <sup>1</sup>   | 90.6(3)   |
| O12–Mo6–O27   | 104.9(2)  | N10 <sup>1</sup> –Mo1–Mo2 | 135.8(2)  |
| O12–Mo6–O23   | 105.4(3)  | O6–Mo2–Mo1                | 48.78(2)  |
| O12–Mo6–O32   | 88.0(2)   | O6–Mo2–O7                 | 88.6(2)   |
| O12–Mo6–O31   | 156.2(2)  | O6–Mo2–N8                 | 88.3(3)   |
| O12–Mo6–N17   | 90.8(3)   | O6–Mo2–N5                 | 164.0(3)  |
| N17–Mo6–Mo5   | 134.65(2) | O7–Mo2–Mo1                | 103.90(2) |
| O28–Mo8–Mo7   | 49.25(1)  | O7–Mo2–N8                 | 75.4(2)   |
| O28–Mo8–O24   | 95.67(2)  | O7–Mo2–N5                 | 75.4(3)   |
| O28–Mo8–O27   | 83.88(2)  | O5–Mo2–Mo1                | 48.7(2)   |
| O28–Mo8–O33   | 90.4(2)   | O5–Mo2–O6                 | 93.5(3)   |
| O28–Mo8–N23   | 161.9(2)  | O5–Mo2–O7                 | 88.9(3)   |
| O24–Mo8–Mo7   | 47.96(1)  | O5–Mo2–N8                 | 164.2(3)  |
| O24–Mo8–O27   | 78.78(2)  | O5–Mo2–N5                 | 86.0(3)   |
| O24–Mo8–O33   | 154.4(2)  | O2–Mo2–Mo1                | 99.8(3)   |
| O24–Mo8–N23   | 85.6(2)   | O2–Mo2–O6                 | 107.3(4)  |
| O27–Mo8–Mo7   | 86.88(1)  | O2–Mo2–O7                 | 156.3(3)  |
| O33–Mo8–Mo7   | 138.28(2) | O2–Mo2–O5                 | 107.0(4)  |
| O33–Mo8–O27   | 77.20(2)  | O2–Mo2–N8                 | 87.3(4)   |
| O33–Mo8–N23   | 81.2(2)   | O2–Mo2–N5                 | 88.1(4)   |
| O14–Mo8–Mo7   | 99.83(2)  | N8–Mo2–Mo1                | 136.8(2)  |
| O14–Mo8–O28   | 104.8(2)  | N5–Mo2–Mo1                | 134.5(2)  |
| O14–Mo8–O24   | 101.5(2)  | N5–Mo2–N8                 | 87.9(3)   |
| O14–Mo8–O27   | 171.2(2)  | Mo7–O28–Mo9               | 144.9(2)  |
| O14–Mo8–O33   | 100.9(2)  | Mo8–O28–Mo7               | 81.81(2)  |
| O14–Mo8–N23   | 92.6(3)   | Mo8–O28–Mo9               | 132.9(2)  |
| N23–Mo8–Mo7   | 133.39(2) | Mo5–O34–Mo16              | 131.5(2)  |
| N23–Mo8–O27   | 78.7(2)   | Mo5–O34–Mo7               | 125.3(2)  |
| O36–Mo11–Mo12 | 142.83(1) | Mo16–O34–Mo7              | 103.09(2) |
| O36–Mo11–N33  | 79.3(2)   | Mo16–O35–Mo7              | 103.1(2)  |
| O30–Mo11–Mo12 | 48.92(1)  | Mo15–O35–Mo16             | 82.21(18) |
| O30–Mo11–O36  | 94.19(2)  | Mo15–O35–Mo7              | 135.3(2)  |
| O30–Mo11–O37  | 87.3(2)   | Mo7–O24–Mo8               | 82.91(19) |
| O30–Mo11–N33  | 163.9(2)  | Mo16–O36–Mo15             | 82.28(2)  |
| O37–Mo11–Mo12 | 98.97(1)  | Mo16–O36–Mo11             | 134.8(2)  |
| O37–Mo11–O36  | 70.80(2)  | Mo15–O36–Mo11             | 103.4(2)  |
| O37–Mo11–N33  | 76.7(2)   | Mo11–O30–Mo5              | 145.3(2)  |
| O26–Mo11–Mo12 | 49.06(2)  | Mo12–O30–Mo5              | 132.3(2)  |
| O26–Mo11–O36  | 158.9(2)  | Mo12–O30–Mo11             | 82.13(2)  |
| O26–Mo11–O30  | 96.5(2)   | Mo15–O37–Mo11             | 103.0(2)  |
| O26–Mo11–O37  | 91.6(2)   | Mo9–O37–Mo15              | 131.3(3)  |
| O26–Mo11–N33  | 85.6(2)   | Mo9–O37–Mo11              | 125.6(2)  |
| O17–Mo11–Mo12 | 102.88(2) | Mo5–O27–Mo6               | 82.23(2)  |
| O17–Mo11–O36  | 89.6(2)   | Mo5–O27–Mo8               | 132.4(2)  |

|               |           |                           |          |
|---------------|-----------|---------------------------|----------|
| O17–Mo11–O30  | 104.6(2)  | Mo6–O27–Mo8               | 145.0(2) |
| O17–Mo11–O37  | 157.9(2)  | Mo6–O23–Mo5               | 83.8(2)  |
| O17–Mo11–O26  | 105.2(3)  | Mo8–O33–Mo14              | 130.9(3) |
| O17–Mo11–N33  | 90.1(3)   | Mo8–O33–Mo10              | 124.8(3) |
| N33–Mo11–Mo12 | 134.55(2) | Mo14–O33–Mo10             | 103.7(2) |
| O28–Mo9–Mo10  | 85.71(1)  | Mo13–O32–Mo6              | 103.7(2) |
| O37–Mo9–Mo10  | 139.30(2) | Mo14–O32–Mo6              | 133.8(2) |
| O37–Mo9–O28   | 78.59(2)  | Mo14–O32–Mo13             | 82.6(2)  |
| O37–Mo9–N27   | 80.8(2)   | Mo9–O29–Mo12              | 131.7(2) |
| O29–Mo9–Mo10  | 49.36(2)  | Mo9–O29–Mo10              | 81.8(2)  |
| O29–Mo9–O28   | 84.01(2)  | Mo10–O29–Mo12             | 146.3(2) |
| O29–Mo9–O37   | 91.5(2)   | Mo12–O31–Mo6              | 124.8(2) |
| O29–Mo9–N27   | 164.4(2)  | Mo12–O31–Mo13             | 131.5(3) |
| O25–Mo9–Mo10  | 47.65(2)  | Mo13–O31–Mo6              | 103.6(2) |
| O25–Mo9–O28   | 77.8(2)   | Mo11–O26–Mo12             | 83.2(2)  |
| O25–Mo9–O37   | 154.5(2)  | Mo13–O38–Mo14             | 82.2(2)  |
| O25–Mo9–O29   | 95.6(2)   | Mo13–O38–Mo10             | 133.4(3) |
| O25–Mo9–N27   | 86.1(2)   | Mo14–O38–Mo10             | 103.7(2) |
| O15–Mo9–Mo10  | 99.6(2)   | Mo10–O25–Mo9              | 83.4(2)  |
| O15–Mo9–O28   | 172.8(2)  | Mo1 <sup>1</sup> –O10–Mo4 | 120.2(2) |
| O15–Mo9–O37   | 100.0(3)  | Mo1–O6–Mo2                | 82.4(3)  |
| O15–Mo9–O29   | 103.1(3)  | N20–N19–Mo7               | 115.2(4) |
| O15–Mo9–O25   | 102.2(3)  | C14–N19–Mo7               | 136.9(5) |
| O15–Mo9–N27   | 91.7(3)   | N19–N20–Mo16              | 116.8(4) |
| N27–Mo9–Mo10  | 133.68(2) | N21–N20–Mo16              | 131.7(5) |
| N27–Mo9–O28   | 81.2(2)   | Mo3–O7–Mo2                | 121.1(3) |
| O30–Mo12–Mo11 | 48.95(1)  | N22–N23–Mo8               | 123.0(5) |
| O30–Mo12–O29  | 85.08(2)  | N24–N23–Mo8               | 127.0(5) |
| O30–Mo12–O31  | 91.52(2)  | Mo3–O9–Mo4                | 81.6(3)  |
| O30–Mo12–N35  | 163.6(3)  | Mo4–O8–Mo3                | 82.8(3)  |
| O29–Mo12–Mo11 | 87.67(1)  | N33–N32–Mo15              | 116.2(4) |
| O31–Mo12–Mo11 | 139.17(1) | N31–N32–Mo15              | 132.7(5) |
| O31–Mo12–O29  | 77.7(2)   | N13–N14–Mo5               | 122.3(4) |
| O31–Mo12–N35  | 81.4(2)   | N15–N14–Mo5               | 127.2(5) |
| O26–Mo12–Mo11 | 47.76(2)  | N27–N26–Mo15              | 121.1(4) |
| O26–Mo12–O30  | 95.3(2)   | N25–N26–Mo15              | 128.1(6) |
| O26–Mo12–O29  | 79.0(2)   | N26–N27–Mo9               | 122.4(5) |
| O26–Mo12–O31  | 155.0(2)  | C17–N27–Mo9               | 127.7(6) |
| O26–Mo12–N35  | 85.5(2)   | N16–N17–Mo6               | 116.7(6) |
| O18–Mo12–Mo11 | 100.0(2)  | N18–N17–Mo6               | 131.3(6) |
| O18–Mo12–O30  | 104.3(3)  | N14–N13–Mo16              | 121.9(4) |
| O18–Mo12–O29  | 170.4(2)  | C10–N13–Mo16              | 129.5(5) |
| O18–Mo12–O31  | 99.8(3)   | N32–N33–Mo11              | 115.8(4) |
| O18–Mo12–O26  | 101.8(3)  | C21–N33–Mo11              | 134.5(6) |
| O18–Mo12–N35  | 91.5(3)   | N23–N22–Mo14              | 120.7(4) |
| N35–Mo12–Mo11 | 133.15(2) | C16–N22–Mo14              | 129.0(5) |
| N35–Mo12–O29  | 79.0(3)   | N17–N16–Mo13              | 115.8(5) |
| O32–Mo13–Mo14 | 48.48(2)  | C12–N16–Mo13              | 136.7(7) |
| O32–Mo13–O31  | 76.32(2)  | Mo2–O5–Mo1                | 82.9(3)  |
| O32–Mo13–N16  | 82.1(2)   | N35–N36–Mo13              | 121.9(5) |

|               |           |                          |          |
|---------------|-----------|--------------------------|----------|
| O32–Mo13–N36  | 156.6(2)  | C23–N36–Mo13             | 126.0(6) |
| O31–Mo13–Mo14 | 98.37(1)  | N29–N30–Mo10             | 115.4(6) |
| O31–Mo13–N16  | 75.9(2)   | C19–N30–Mo10             | 134.4(7) |
| O31–Mo13–N36  | 81.1(2)   | N7–N8–Mo2                | 122.3(5) |
| O38–Mo13–Mo14 | 49.07(2)  | N9–N8–Mo2                | 126.9(7) |
| O38–Mo13–O32  | 94.4(2)   | N36–N35–Mo12             | 122.2(5) |
| O38–Mo13–O31  | 96.5(2)   | N34–N35–Mo12             | 128.1(7) |
| O38–Mo13–N16  | 172.2(2)  | N10–N11–Mo4              | 123.8(6) |
| O38–Mo13–N36  | 82.0(3)   | N12–N11–Mo4              | 126.5(7) |
| O19–Mo13–Mo14 | 102.3(2)  | N8–N7–Mo3                | 124.7(6) |
| O19–Mo13–O32  | 110.8(3)  | C6–N7–Mo3                | 126.9(6) |
| O19–Mo13–O31  | 157.2(3)  | N2–N1–Mo4 <sup>1</sup>   | 124.3(6) |
| O19–Mo13–O38  | 104.3(3)  | C2–N1–Mo4 <sup>1</sup>   | 128.4(9) |
| O19–Mo13–N16  | 83.5(3)   | N1–N2–Mo1                | 122.7(6) |
| O19–Mo13–N36  | 92.5(3)   | N3–N2–Mo1                | 124.7(9) |
| N16–Mo13–Mo14 | 129.43(2) | N4–N5–Mo2                | 124.0(7) |
| N36–Mo13–Mo14 | 130.9(2)  | N6–N5–Mo2                | 127.5(1) |
| N36–Mo13–N16  | 98.4(3)   | N30–N29–Mo14             | 117.1(5) |
| O33–Mo14–Mo13 | 97.13(1)  | N28–N29–Mo14             | 134.9(7) |
| O33–Mo14–N22  | 81.4(2)   | N11–N10–Mo1 <sup>1</sup> | 123.0(6) |
| O33–Mo14–N29  | 74.9(2)   | C8–N10–Mo1 <sup>1</sup>  | 128.8(8) |
| O32–Mo14–Mo13 | 48.90(2)  | N5–N4–Mo3                | 122.7(7) |
| O32–Mo14–O33  | 95.4(2)   | C4–N4–Mo3                | 127.7(1) |

Symmetric codes: <sup>1</sup>1 – x, 2 – y, -z.

**Table S10.** Selected bond distances ( Å ) and angles ( ° ) in [Mo<sub>8</sub>O<sub>8</sub>(μ<sub>2</sub>-O)<sub>12</sub>(Htrz)<sub>8</sub>] 62H<sub>2</sub>O (**4**) after solvent mask and final refinements.

| <b>4</b>                 |           |                      |           |
|--------------------------|-----------|----------------------|-----------|
| Mo4–Mo3                  | 2.5550(5) | Mo3–N5               | 2.211(4)  |
| Mo4–O9                   | 1.948(3)  | Mo8–O11 <sup>2</sup> | 2.154(4)  |
| Mo4–O8                   | 1.943(4)  | Mo8–O19              | 1.940(3)  |
| Mo4–O2 <sup>1</sup>      | 2.147(3)  | Mo8–O18              | 1.948(4)  |
| Mo4–O10                  | 1.688(4)  | Mo8–O20              | 1.699(4)  |
| Mo4–N8                   | 2.193(4)  | Mo8–N24              | 2.194(5)  |
| Mo4–N12                  | 2.197(4)  | Mo8–N15 <sup>2</sup> | 2.206(4)  |
| Mo7–Mo8                  | 2.5499(6) | Mo2–O6               | 2.141(3)  |
| Mo7–O16                  | 2.136(3)  | Mo2–O3               | 1.941(4)  |
| Mo7–O19                  | 1.936(4)  | Mo2–O4               | 1.937(4)  |
| Mo7–O18                  | 1.938(4)  | Mo2–N2               | 2.183(5)  |
| Mo7–O17                  | 1.688(4)  | Mo2–N6               | 2.223(4)  |
| Mo7–N20                  | 2.191(4)  | Mo2–O5               | 1.691(4)  |
| Mo7–N17                  | 2.214(4)  | Mo5–Mo6              | 2.5468(6) |
| Mo1–Mo2                  | 2.5471(6) | Mo5–O14              | 1.934(4)  |
| Mo1–O3                   | 1.943(4)  | Mo5–O11              | 2.146(3)  |
| Mo1–O4                   | 1.934(4)  | Mo5–O13              | 1.940(4)  |
| Mo1–O2                   | 2.156(3)  | Mo5–N14              | 2.207(4)  |
| Mo1–O1                   | 1.696(4)  | Mo5–N23 <sup>2</sup> | 2.205(5)  |
| Mo1–N9 <sup>1</sup>      | 2.202(4)  | Mo5–O12              | 1.692(4)  |
| Mo1–N11 <sup>1</sup>     | 2.208(5)  | Mo6–O16              | 2.151(3)  |
| Mo3–O6                   | 2.152(3)  | Mo6–O14              | 1.948(4)  |
| Mo3–O9                   | 1.943(3)  | Mo6–O13              | 1.937(4)  |
| Mo3–O8                   | 1.944(4)  | Mo6–N18              | 2.206(4)  |
| Mo3–O7                   | 1.691(4)  | Mo6–N21              | 2.195(5)  |
| Mo3–N3                   | 2.196(4)  | Mo6–O15              | 1.684(4)  |
| O9–Mo4–Mo3               | 48.86(1)  | O6–Mo2–N2            | 74.88(1)  |
| O9–Mo4–O2 <sup>1</sup>   | 88.71(1)  | O6–Mo2–N6            | 75.17(1)  |
| O9–Mo4–N8                | 163.43(2) | O3–Mo2–Mo1           | 49.06(1)  |
| O9–Mo4–N12               | 86.87(2)  | O3–Mo2–O6            | 89.15(1)  |
| O8–Mo4–Mo3               | 48.93(1)  | O3–Mo2–N2            | 163.97(2) |
| O8–Mo4–O9                | 94.02(1)  | O3–Mo2–N6            | 87.50(2)  |
| O8–Mo4–O2 <sup>1</sup>   | 90.15(2)  | O4–Mo2–Mo1           | 48.81(1)  |
| O8–Mo4–N8                | 86.47(2)  | O4–Mo2–O6            | 90.90(1)  |
| O8–Mo4–N12               | 165.34(2) | O4–Mo2–O3            | 93.67(2)  |
| O2 <sup>1</sup> –Mo4–Mo3 | 104.54(9) | O4–Mo2–N2            | 85.45(2)  |
| O2 <sup>1</sup> –Mo4–N8  | 74.72(2)  | O4–Mo2–N6            | 166.00(2) |
| O2 <sup>1</sup> –Mo4–N12 | 75.23(2)  | N2–Mo2–Mo1           | 133.96(1) |
| O10–Mo4–Mo3              | 99.29(1)  | N2–Mo2–N6            | 89.59(2)  |
| O10–Mo4–O9               | 106.21(2) | N6–Mo2–Mo1           | 135.99(1) |
| O10–Mo4–O8               | 106.85(2) | O5–Mo2–Mo1           | 98.77(2)  |
| O10–Mo4–O2 <sup>1</sup>  | 156.13(2) | O5–Mo2–O6            | 154.98(2) |
| O10–Mo4–N8               | 89.41(2)  | O5–Mo2–O3            | 107.07(2) |
| O10–Mo4–N12              | 86.86(2)  | O5–Mo2–O4            | 106.51(2) |

|                                       |           |                           |           |
|---------------------------------------|-----------|---------------------------|-----------|
| N8–Mo4–Mo3                            | 135.25(1) | O5–Mo2–N2                 | 88.46(2)  |
| N8–Mo4–N12                            | 88.56(2)  | O5–Mo2–N6                 | 86.39(2)  |
| N12–Mo4–Mo3                           | 135.39(1) | O14–Mo5–Mo6               | 49.24(1)  |
| O16–Mo7–Mo8                           | 105.50(8) | O14–Mo5–O11               | 88.74(1)  |
| O16–Mo7–N20                           | 75.18(2)  | O14–Mo5–O13               | 94.01(2)  |
| O16–Mo7–N17                           | 75.10(1)  | O14–Mo5–N14               | 85.73(2)  |
| O19–Mo7–Mo8                           | 48.94(1)  | O14–Mo5–N23 <sup>2</sup>  | 163.64(2) |
| O19–Mo7–O16                           | 90.87(1)  | O11–Mo5–Mo6               | 106.12(1) |
| O19–Mo7–O18                           | 94.15(2)  | O11–Mo5–N14               | 75.27(2)  |
| O19–Mo7–N20                           | 86.02(2)  | O11–Mo5–N23 <sup>2</sup>  | 74.90(2)  |
| O19–Mo7–N17                           | 165.80(2) | O13–Mo5–Mo6               | 48.89(1)  |
| O18–Mo7–Mo8                           | 49.14(1)  | O13–Mo5–O11               | 91.29(2)  |
| O18–Mo7–O16                           | 88.79(1)  | O13–Mo5–N14               | 166.57(2) |
| O18–Mo7–N20                           | 163.97(2) | O13–Mo5–N23 <sup>2</sup>  | 86.36(2)  |
| O18–Mo7–N17                           | 87.91(2)  | N14–Mo5–Mo6               | 134.38(1) |
| O17–Mo7–Mo8                           | 98.88(2)  | N23 <sup>2</sup> –Mo5–Mo6 | 135.00(1) |
| O17–Mo7–O16                           | 155.57(2) | N23 <sup>2</sup> –Mo5–N14 | 90.14(2)  |
| O17–Mo7–O19                           | 106.60(2) | O12–Mo5–Mo6               | 98.85(2)  |
| O17–Mo7–O18                           | 106.38(2) | O12–Mo5–O14               | 106.9(2)  |
| O17–Mo7–N20                           | 88.86(2)  | O12–Mo5–O11               | 155.0(2)  |
| O17–Mo7–N17                           | 86.2(2)   | O12–Mo5–O13               | 106.52(2) |
| N20–Mo7–Mo8                           | 134.73(1) | O12–Mo5–N14               | 86.33(2)  |
| N20–Mo7–N17                           | 88.16(2)  | O12–Mo5–N23 <sup>2</sup>  | 88.6(2)   |
| N17–Mo7–Mo8                           | 136.58(1) | O16–Mo6–Mo5               | 105.02(9) |
| O3–Mo1–Mo2                            | 48.99(1)  | O16–Mo6–N18               | 75.41(2)  |
| O3–Mo1–O2                             | 89.94(1)  | O16–Mo6–N21               | 74.98(1)  |
| O3–Mo1–N9 <sup>1</sup>                | 164.40(2) | O14–Mo6–Mo5               | 48.77(1)  |
| O3–Mo1–N11 <sup>1</sup>               | 86.46(2)  | O14–Mo6–O16               | 91.23(1)  |
| O4–Mo1–Mo2                            | 48.91(1)  | O14–Mo6–N18               | 166.52(2) |
| O4–Mo1–O3                             | 93.70(2)  | O14–Mo6–N21               | 86.57(2)  |
| O4–Mo1–O2                             | 91.15(1)  | O13–Mo6–Mo5               | 48.98(1)  |
| O4–Mo1–N9 <sup>1</sup>                | 85.03(2)  | O13–Mo6–O16               | 87.46(1)  |
| O4–Mo1–N11 <sup>1</sup>               | 166.00(2) | O13–Mo6–O14               | 93.66(2)  |
| O2–Mo1–Mo2                            | 107.02(9) | O13–Mo6–N18               | 87.64(2)  |
| O2–Mo1–N9 <sup>1</sup>                | 74.56(1)  | O13–Mo6–N21               | 162.43(2) |
| O2–Mo1–N11 <sup>1</sup>               | 74.85(1)  | N18–Mo6–Mo5               | 136.01(1) |
| O1–Mo1–Mo2                            | 99.22(2)  | N21–Mo6–Mo5               | 135.20(1) |
| O1–Mo1–O3                             | 107.16(2) | N21–Mo6–N18               | 88.18(2)  |
| O1–Mo1–O4                             | 107.02(2) | O15–Mo6–Mo5               | 98.95(2)  |
| O1–Mo1–O2                             | 153.75(2) | O15–Mo6–O16               | 155.95(2) |
| O1–Mo1–N9 <sup>1</sup>                | 88.02(2)  | O15–Mo6–O14               | 106.26(2) |
| O1–Mo1–N11 <sup>1</sup>               | 86.23(2)  | O15–Mo6–O13               | 107.3(2)  |
| N9 <sup>1</sup> –Mo1–Mo2              | 133.60(1) | O15–Mo6–N18               | 86.08(2)  |
| N9 <sup>1</sup> –Mo1–N11 <sup>1</sup> | 91.05(2)  | O15–Mo6–N21               | 89.4(2)   |
| N11 <sup>1</sup> –Mo1–Mo2             | 134.90(1) | Mo2–O6–Mo3                | 121.68(2) |
| O6–Mo3–Mo4                            | 105.05(8) | Mo7–O16–Mo6               | 121.95(2) |
| O6–Mo3–N3                             | 75.10(1)  | Mo5–O14–Mo6               | 81.98(1)  |
| O6–Mo3–N5                             | 75.69(2)  | Mo3–O9–Mo4                | 82.10(1)  |
| O9–Mo3–Mo4                            | 49.04(1)  | Mo2–O3–Mo1                | 81.95(1)  |
| O9–Mo3–O6                             | 91.34(1)  | Mo4–O8–Mo3                | 82.17(1)  |

|                                        |           |                          |           |
|----------------------------------------|-----------|--------------------------|-----------|
| O9–Mo3–O8                              | 94.16(1)  | Mo5–O11–Mo8 <sup>2</sup> | 120.82(2) |
| O9–Mo3–N3                              | 86.65(2)  | Mo7–O19–Mo8              | 82.25(1)  |
| O9–Mo3–N5                              | 166.94(2) | Mo1–O4–Mo2               | 82.27(1)  |
| O8–Mo3–Mo4                             | 48.90(1)  | Mo4 <sup>1</sup> –O2–Mo1 | 121.23(2) |
| O8–Mo3–O6                              | 88.18(1)  | Mo7–O18–Mo8              | 82.02(1)  |
| O8–Mo3–N3                              | 163.28(2) | Mo6–O13–Mo5              | 82.14(2)  |
| O8–Mo3–N5                              | 87.07(2)  | N2–N3–Mo3                | 122.1(3)  |
| O7–Mo3–Mo4                             | 99.52(1)  | C1–N3–Mo3                | 129.7(4)  |
| O7–Mo3–O6                              | 155.39(2) | N17–N18–Mo6              | 123.4(3)  |
| O7–Mo3–O9                              | 106.12(2) | C11–N18–Mo6              | 126.9(4)  |
| O7–Mo3–O8                              | 107.25(2) | N20–N21–Mo6              | 122.9(3)  |
| O7–Mo3–N3                              | 88.48(2)  | C13–N21–Mo6              | 129.0(5)  |
| O7–Mo3–N5                              | 85.84(2)  | N8–N9–Mo1 <sup>1</sup>   | 123.3(3)  |
| N3–Mo3–Mo4                             | 135.55(1) | C5–N9–Mo1 <sup>1</sup>   | 128.3(4)  |
| N3–Mo3–N5                              | 88.49(2)  | N6–N5–Mo3                | 123.6(3)  |
| N5–Mo3–Mo4                             | 135.42(1) | N4–N5–Mo3                | 126.8(4)  |
| O11 <sup>2</sup> –Mo8–Mo7              | 106.07(9) | N15–N14–Mo5              | 124.3(3)  |
| O11 <sup>2</sup> –Mo8–N24              | 75.11(2)  | N13–N14–Mo5              | 126.7(4)  |
| O11 <sup>2</sup> –Mo8–N15 <sup>2</sup> | 75.58(2)  | N12–N11–Mo1 <sup>1</sup> | 121.4(3)  |
| O19–Mo8–Mo7                            | 48.81(1)  | N10–N11–Mo1 <sup>1</sup> | 128.5(4)  |
| O19–Mo8–O11 <sup>2</sup>               | 90.26(1)  | N21–N20–Mo7              | 124.2(3)  |
| O19–Mo8–O18                            | 93.73(2)  | N19–N20–Mo7              | 125.9(4)  |
| O19–Mo8–N24                            | 84.84(2)  | N3–N2–Mo2                | 124.7(3)  |
| O19–Mo8–N15 <sup>2</sup>               | 165.73(2) | N1–N2–Mo2                | 125.6(4)  |
| O18–Mo8–Mo7                            | 48.83(1)  | N18–N17–Mo7              | 122.8(3)  |
| O18–Mo8–O11 <sup>2</sup>               | 90.33(1)  | N16–N17–Mo7              | 128.5(4)  |
| O18–Mo8–N24                            | 165.35(2) | N23–N24–Mo8              | 124.4(4)  |
| O18–Mo8–N15 <sup>2</sup>               | 88.21(2)  | C15–N24–Mo8              | 126.9(5)  |
| O20–Mo8–Mo7                            | 99.18(2)  | N5–N6–Mo2                | 121.9(3)  |
| O20–Mo8–O11 <sup>2</sup>               | 154.75(2) | C3–N6–Mo2                | 129.3(4)  |
| O20–Mo8–O19                            | 106.47(2) | N14–N15–Mo8 <sup>2</sup> | 121.8(3)  |
| O20–Mo8–O18                            | 106.88(2) | C9–N15–Mo8 <sup>2</sup>  | 130.0(4)  |
| O20–Mo8–N24                            | 87.4(2)   | N9–N8–Mo4                | 123.5(3)  |
| O20–Mo8–N15 <sup>2</sup>               | 86.40(2)  | N7–N8–Mo4                | 126.8(4)  |
| N24–Mo8–Mo7                            | 133.28(1) | N11–N12–Mo4              | 125.0(3)  |
| N24–Mo8–N15 <sup>2</sup>               | 89.72(2)  | C7–N12–Mo4               | 126.3(4)  |
| N15 <sup>2</sup> –Mo8–Mo7              | 136.60(1) | N24–N23–Mo5 <sup>2</sup> | 122.1(3)  |
| O6–Mo2–Mo1                             | 106.24(9) | N22–N23–Mo5 <sup>2</sup> | 128.5(5)  |

Symmetric codes: <sup>1</sup> 1 – x, –y, 1 – z; <sup>2</sup> 1 – x, 1 – y, 2 – z.

**Table S11.** Detail calibrated adsorption data of O<sub>2</sub>, N<sub>2</sub>, H<sub>2</sub>, CO<sub>2</sub> and CH<sub>4</sub> for [Mo<sub>12</sub>O<sub>12</sub>(μ<sub>2</sub>-O)<sub>4</sub>(μ<sub>3</sub>-O)<sub>12</sub>(Htrz)<sub>4</sub>(trz)<sub>4</sub>] $\cdot$ 22H<sub>2</sub>O (**1**) at 298 K.

| Gases            | O <sub>2</sub> |                   | CO <sub>2</sub> |                   | CH <sub>4</sub> |                   | N <sub>2</sub> |                   | H <sub>2</sub> |                   |
|------------------|----------------|-------------------|-----------------|-------------------|-----------------|-------------------|----------------|-------------------|----------------|-------------------|
| Temperature (°C) | Pressure (bar) | Adsorption (mg/g) | Pressure (bar)  | Adsorption (mg/g) | Pressure (bar)  | Adsorption (mg/g) | Pressure (bar) | Adsorption (mg/g) | Pressure (bar) | Adsorption (mg/g) |
| 25.0             | 0              | 0                 | 0               | 0                 | 0               | 0                 | 0              | 0                 | 0              | 0                 |
|                  | 0.900          | 1.5813            | 1.890           | 9.0025            | 0.900           | 0.9257            | 1.890          | 1.7564            | 0.940          | 0.7972            |
|                  | 1.890          | 1.9301            | 3.900           | 13.5607           | 1.900           | 1.2820            | 3.900          | 1.6592            | 1.900          | 0.8505            |
|                  | 3.900          | 2.6979            | 5.899           | 16.6295           | 3.892           | 1.7251            | 5.891          | 1.8107            | 3.910          | 1.0087            |
|                  | 5.900          | 3.4002            | 7.894           | 18.5663           | 5.900           | 2.0589            | 7.894          | 1.8859            | 5.920          | 1.1248            |
|                  | 7.892          | 4.0917            | 9.895           | 21.1311           | 7.891           | 2.5872            | 9.893          | 1.5630            | 7.903          | 1.2074            |
|                  | 9.896          | 4.8177            | 11.892          | 21.3441           | 9.897           | 3.0075            | 11.894         | 1.5258            | 9.908          | 1.2834            |
|                  | 11.897         | 5.4820            | 13.894          | 22.7225           | 11.896          | 3.2776            | 13.897         | 1.5629            | 11.898         | 1.2871            |
|                  | 13.894         | 6.1824            | 15.894          | 24.6018           | 13.897          | 3.5745            | 15.897         | 1.3655            | 13.900         | 1.2602            |
|                  | 15.896         | 6.8405            | 17.891          | 24.2306           | 15.894          | 3.8736            | 17.895         | 1.8172            | 15.904         | 1.4452            |
|                  | 17.893         | 7.5693            | 19.891          | 24.9869           | 17.897          | 4.0393            | 19.898         | 1.3034            | 17.903         | 1.3809            |
|                  | 19.894         | 8.2260            | 21.890          | 25.4241           | 19.893          | 4.3574            | 21.894         | 1.0864            | 19.905         | 1.4030            |
|                  | 21.894         | 8.9479            | 23.893          | 26.4310           | 21.897          | 4.6019            | 23.895         | 0.9024            | 21.903         | 1.3629            |
|                  | 23.897         | 9.7688            | 25.891          | 27.3056           | 23.895          | 4.8638            | 25.893         | 0.1680            | 23.905         | 1.3439            |
|                  | 25.894         | 10.2773           | 27.891          | 27.4578           | 25.894          | 5.0127            | 27.894         | 0.2313            | 25.899         | 1.4795            |
|                  | 27.895         | 10.8506           | 29.890          | 26.9080           | 27.895          | 5.5375            | 29.897         | 0.5958            | 27.902         | 1.3596            |
|                  | 29.894         | 11.3417           |                 |                   | 29.894          | 5.5375            |                |                   | 29.901         | 1.4205            |



**Table S12.** Detail calibrated adsorption data of O<sub>2</sub>, N<sub>2</sub>, H<sub>2</sub>, CO<sub>2</sub> and CH<sub>4</sub> for [Mo<sub>12</sub>O<sub>12</sub>(μ<sub>2</sub>-O)<sub>4</sub>(μ<sub>3</sub>-O)<sub>12</sub>(Htrz)<sub>4</sub>(trz)<sub>4</sub>]·92H<sub>2</sub>O (**2**) at 298 K.

| Gases            |                | O <sub>2</sub>    |                | CO <sub>2</sub>   |                | CH <sub>4</sub>   |                | N <sub>2</sub>    |                | H <sub>2</sub>    |  |
|------------------|----------------|-------------------|----------------|-------------------|----------------|-------------------|----------------|-------------------|----------------|-------------------|--|
| Temperature (°C) | Pressure (bar) | Adsorption (mg/g) |  |
| 25.0             | 0              | 0                 | 0              | 0                 | 0              | 0                 | 0              | 0                 | 0              | 0                 |  |
|                  | 0.900          | 1.4501            | 0.900          | 3.2546            | 0.890          | 1.3226            | 1.900          | 1.8467            | 0.950          | 0.5587            |  |
|                  | 1.900          | 1.7079            | 1.898          | 5.0015            | 1.900          | 1.7825            | 3.892          | 1.9404            | 1.900          | 0.5563            |  |
|                  | 3.890          | 2.2177            | 3.895          | 7.5216            | 3.900          | 1.9703            | 5.895          | 2.0959            | 3.900          | 0.8015            |  |
|                  | 5.900          | 2.8717            | 5.890          | 9.4914            | 5.892          | 2.1854            | 7.899          | 2.3314            | 5.920          | 0.8594            |  |
|                  | 7.899          | 3.3792            | 7.899          | 11.4860           | 7.900          | 2.4001            | 9.892          | 2.5248            | 7.901          | 0.8961            |  |
|                  | 9.894          | 4.0212            | 9.893          | 12.7996           | 9.896          | 2.5265            | 11.897         | 2.5403            | 9.902          | 0.8909            |  |
|                  | 11.900         | 4.7719            | 11.893         | 14.3160           | 11.895         | 2.7388            | 13.897         | 2.3445            | 11.899         | 0.9466            |  |
|                  | 13.899         | 5.3626            | 13.898         | 15.6131           | 13.897         | 2.8865            | 15.897         | 2.2223            | 13.903         | 0.9576            |  |
|                  | 15.895         | 5.8832            | 15.896         | 16.3529           | 15.895         | 3.1307            | 17.894         | 2.2450            | 15.904         | 0.9958            |  |
|                  | 17.895         | 6.2592            | 17.893         | 17.3741           | 17.898         | 3.2823            | 19.894         | 2.2363            | 17.906         | 1.0091            |  |
|                  | 19.895         | 6.8636            | 19.894         | 18.4949           | 19.898         | 3.4875            | 21.896         | 2.2363            | 19.902         | 1.0193            |  |
|                  | 21.893         | 7.4717            | 21.892         | 19.4329           | 21.896         | 3.8252            | 23.893         | 2.1959            | 21.904         | 0.9880            |  |
|                  | 23.894         | 7.9572            | 23.891         | 20.5326           | 23.899         | 4.0227            | 25.894         | 2.0587            | 23.902         | 1.0013            |  |
|                  | 25.895         | 8.4706            | 25.891         | 21.8976           | 25.897         | 4.0868            | 27.896         | 2.1265            | 25.901         | 1.0066            |  |
|                  | 27.893         | 9.0386            | 27.890         | 22.3821           | 27.898         | 3.8209            | 29.896         | 2.0240            | 27.905         | 1.0055            |  |
| 29.894           | 9.5352         | 29.892            | 22.3821        | 29.895            | 4.1120         |                   |                | 29.905            | 0.9363         |                   |  |

**Table S13.** Detail calibrated adsorption data of O<sub>2</sub>, N<sub>2</sub>, H<sub>2</sub>, CO<sub>2</sub> and CH<sub>4</sub> for [Mo<sub>8</sub>O<sub>8</sub>(μ<sub>2</sub>-O)<sub>12</sub>(Htrz)<sub>8</sub>]·62H<sub>2</sub>O (**4**) at 298 K.

| Gases            |                | O <sub>2</sub>    |                | CO <sub>2</sub>   |                | CH <sub>4</sub>   |                | N <sub>2</sub>    |                | H <sub>2</sub>    |  |
|------------------|----------------|-------------------|----------------|-------------------|----------------|-------------------|----------------|-------------------|----------------|-------------------|--|
| Temperature (°C) | Pressure (bar) | Adsorption (mg/g) |  |
| 25.0             | 0              | 0                 | 0              | 0                 | 0              | 0                 | 0              | 0                 | 0              | 0                 |  |
|                  | 1.890          | 1.9801            | 1.900          | 4.3777            | 1.900          | 1.6147            | 1.900          | 1.4938            | 0.900          | 0.9765            |  |
|                  | 3.900          | 2.7500            | 3.895          | 5.5027            | 3.890          | 1.8450            | 3.900          | 1.4683            | 1.910          | 1.2171            |  |
|                  | 5.900          | 3.3188            | 5.900          | 6.4341            | 5.895          | 2.2571            | 5.897          | 1.2941            | 3.940          | 1.5123            |  |
|                  | 7.893          | 4.0136            | 7.891          | 6.5935            | 7.895          | 2.5051            | 7.890          | 1.4545            | 5.900          | 1.6228            |  |
|                  | 9.897          | 4.8157            | 9.893          | 7.0682            | 9.898          | 2.8680            | 9.896          | 1.3581            | 7.900          | 1.6403            |  |
|                  | 11.896         | 5.4713            | 11.897         | 7.8248            | 11.898         | 3.0938            | 11.895         | 1.5277            | 9.899          | 1.7455            |  |
|                  | 13.900         | 6.2334            | 13.891         | 7.5977            | 13.897         | 3.3608            | 13.895         | 1.2208            | 11.901         | 1.8427            |  |
|                  | 15.894         | 6.9517            | 15.891         | 7.8816            | 15.896         | 3.7361            | 15.895         | 1.1456            | 13.903         | 1.8760            |  |
|                  | 17.895         | 7.6225            | 17.894         | 7.7419            | 17.897         | 3.7925            | 17.895         | 0.7756            | 15.905         | 1.9831            |  |
|                  | 19.894         | 8.4193            | 19.892         | 7.4837            | 19.897         | 3.9513            | 19.895         | 0.8226            | 17.902         | 1.9784            |  |
|                  | 21.896         | 9.0010            | 21.892         | 7.3727            | 21.894         | 4.5598            | 21.896         | 1.0951            | 19.904         | 1.9884            |  |
|                  | 23.894         | 9.5698            | 23.895         | 7.6885            | 23.895         | 4.6446            | 23.895         | 0.6176            | 21.904         | 2.0333            |  |
|                  | 25.895         | 10.4327           | 25.893         | 7.4434            | 25.895         | 4.8430            | 25.894         | 0.4748            | 23.905         | 2.0177            |  |
|                  | 27.895         | 10.8618           | 27.890         | 7.5405            | 27.896         | 5.4442            | 27.892         | 0.6507            | 25.905         | 1.9880            |  |
|                  | 29.894         | 11.5437           | 29.892         | 7.7903            | 29.893         | 5.4442            | 29.891         | 0.0657            | 27.907         | 2.0204            |  |
|                  |                |                   |                |                   |                |                   |                | 29.903            | 2.0466         |                   |  |

**Table S14.** Bond valence calculations for complexes  $[\text{Mo}_{12}\text{O}_{12}(\mu_2\text{-O})_4(\mu_3\text{-O})_{12}(\text{Htrz})_4(\text{trz})_4]\cdot n\text{H}_2\text{O}$  ( $n = 22$ , **1**;  $n = 92$ , **2**),  $[\text{Mo}_8\text{O}_8(\mu_2\text{-O})_{12}(\text{Htrz})_8]_{1/2}\cdot[\text{Mo}_{12}\text{O}_{12}(\mu_2\text{-O})_4(\mu_3\text{-O})_{12}(\text{Htrz})_4(\text{trz})_4]\cdot 44\text{H}_2\text{O}$  (**3**) and  $[\text{Mo}_8\text{O}_8(\mu_2\text{-O})_{12}(\text{Htrz})_8] \cdot 62\text{H}_2\text{O}$  (**4**) respectively.

| Complexes                                                                                                                                                                                                        | Atoms | N         | $\sum S_{ij}$             | $\Delta$                  |                           |
|------------------------------------------------------------------------------------------------------------------------------------------------------------------------------------------------------------------|-------|-----------|---------------------------|---------------------------|---------------------------|
| $[\text{Mo}_{12}\text{O}_{12}(\mu_2\text{-O})_4(\mu_3\text{-O})_{12}(\text{Htrz})_4(\text{trz})_4]\cdot 22\text{H}_2\text{O}$ ( <b>1</b> )                                                                       | Mo1   | 5+        | 5.299                     | 0.299                     |                           |
|                                                                                                                                                                                                                  | Mo2   | 5+        | 5.223                     | 0.223                     |                           |
|                                                                                                                                                                                                                  | Mo3   | 5+        | 5.248                     | 0.248                     |                           |
|                                                                                                                                                                                                                  | Mo4   | 5+        | 5.234                     | 0.234                     |                           |
|                                                                                                                                                                                                                  | Mo5   | 5+        | 5.303                     | 0.303                     |                           |
|                                                                                                                                                                                                                  | Mo6   | 5+        | 5.173                     | 0.173                     |                           |
|                                                                                                                                                                                                                  | Mo7   | 5+        | 5.411                     | 0.411                     |                           |
|                                                                                                                                                                                                                  | Mo8   | 5+        | 5.210                     | 0.210                     |                           |
|                                                                                                                                                                                                                  | Mo9   | 5+        | 5.323                     | 0.323                     |                           |
|                                                                                                                                                                                                                  | Mo10  | 5+        | 5.310                     | 0.310                     |                           |
|                                                                                                                                                                                                                  | Mo11  | 5+        | 5.315                     | 0.315                     |                           |
|                                                                                                                                                                                                                  | Mo12  | 5+        | 5.285                     | 0.285                     |                           |
|                                                                                                                                                                                                                  |       | <b>5+</b> | <b>5.278<sub>av</sub></b> | <b>0.278<sub>av</sub></b> |                           |
| $[\text{Mo}_{12}\text{O}_{12}(\mu_2\text{-O})_4(\mu_3\text{-O})_{12}(\text{Htrz})_4(\text{trz})_4]\cdot 92\text{H}_2\text{O}$ ( <b>2</b> )                                                                       | Mo1   | 5+        | 5.233                     | 0.233                     |                           |
|                                                                                                                                                                                                                  | Mo2   | 5+        | 5.303                     | 0.303                     |                           |
|                                                                                                                                                                                                                  | Mo3   | 5+        | 5.326                     | 0.326                     |                           |
|                                                                                                                                                                                                                  |       |           | <b>5+</b>                 | <b>5.287<sub>av</sub></b> | <b>0.287<sub>av</sub></b> |
|                                                                                                                                                                                                                  | Mo1   | 5+        | 5.376                     | 0.376                     |                           |
|                                                                                                                                                                                                                  | Mo2   | 5+        | 5.377                     | 0.377                     |                           |
|                                                                                                                                                                                                                  | Mo3   | 5+        | 5.244                     | 0.244                     |                           |
|                                                                                                                                                                                                                  | Mo4   | 5+        | 5.333                     | 0.333                     |                           |
| $[\text{Mo}_8\text{O}_8(\mu_2\text{-O})_{12}(\text{Htrz})_8]_{1/2}\cdot[\text{Mo}_{12}\text{O}_{12}(\mu_2\text{-O})_4(\mu_3\text{-O})_{12}(\text{Htrz})_4(\text{trz})_4]\cdot 44\text{H}_2\text{O}$ ( <b>3</b> ) | Mo5   | 5+        | 5.321                     | 0.321                     |                           |
|                                                                                                                                                                                                                  | Mo6   | 5+        | 5.222                     | 0.222                     |                           |
|                                                                                                                                                                                                                  | Mo7   | 5+        | 5.256                     | 0.256                     |                           |
|                                                                                                                                                                                                                  | Mo8   | 5+        | 5.314                     | 0.314                     |                           |
|                                                                                                                                                                                                                  | Mo9   | 5+        | 5.365                     | 0.365                     |                           |
|                                                                                                                                                                                                                  | Mo10  | 5+        | 5.245                     | 0.245                     |                           |
|                                                                                                                                                                                                                  | Mo11  | 5+        | 5.217                     | 0.217                     |                           |
|                                                                                                                                                                                                                  | Mo12  | 5+        | 5.346                     | 0.346                     |                           |
| $[\text{Mo}_8\text{O}_8(\mu_2\text{-O})_{12}(\text{Htrz})_8] \cdot 62\text{H}_2\text{O}$ ( <b>4</b> )                                                                                                            | Mo13  | 5+        | 5.342                     | 0.342                     |                           |
|                                                                                                                                                                                                                  | Mo14  | 5+        | 5.453                     | 0.453                     |                           |
|                                                                                                                                                                                                                  | Mo15  | 5+        | 5.432                     | 0.432                     |                           |
|                                                                                                                                                                                                                  | Mo16  | 5+        | 5.392                     | 0.392                     |                           |
|                                                                                                                                                                                                                  |       | <b>5+</b> | <b>5.327<sub>av</sub></b> | <b>0.327<sub>av</sub></b> |                           |

|                                                                                                                |     |           |                           |                           |
|----------------------------------------------------------------------------------------------------------------|-----|-----------|---------------------------|---------------------------|
|                                                                                                                | Mo1 | 5+        | 5.292                     | 0.292                     |
|                                                                                                                | Mo2 | 5+        | 5.346                     | 0.346                     |
|                                                                                                                | Mo3 | 5+        | 5.306                     | 0.306                     |
|                                                                                                                | Mo4 | 5+        | 5.349                     | 0.349                     |
| [Mo <sub>8</sub> O <sub>8</sub> (μ <sub>2</sub> -O) <sub>12</sub> (Htrz) <sub>8</sub> ] 62H <sub>2</sub> O (4) | Mo5 | 5+        | 5.330                     | 0.330                     |
|                                                                                                                | Mo6 | 5+        | 5.352                     | 0.352                     |
|                                                                                                                | Mo7 | 5+        | 5.379                     | 0.379                     |
|                                                                                                                | Mo8 | 5+        | 5.271                     | 0.271                     |
|                                                                                                                |     | <b>5+</b> | <b>5.328<sub>av</sub></b> | <b>0.328<sub>av</sub></b> |
